# Supplementary material for: Mesoscale convection system and occurrence of extreme low tropopause temperatures: observations over Asian summer monsoon region
Source: Copernicus journal article supplement (doi:10.5194/angeo-28-927-2010), 2010-04-12

### Auxiliary Material File 1.

Contour maps of daily mean OLR (i.e.  $\leq 160 \text{ Wm}^{-2}$ ) and that of NCEP reanalysis temperature ( $\leq 191\text{K}$ ) at 100 hPa level are shown. OLR data is obtained from NOAA website. Areas of low OLR are shaded with grey and areas of low temperature (i.e.  $T_{100} \leq 191\text{K}$ ) are hatched for distinction.

Period: 30 June to 15 August , 2002

Westward movement of the areas of low OLR and low  $T_{100}$  systems, from day to day, is evident. Relative spatial location of the areas of low OLR and low  $T_{100}$  areas can be observed.

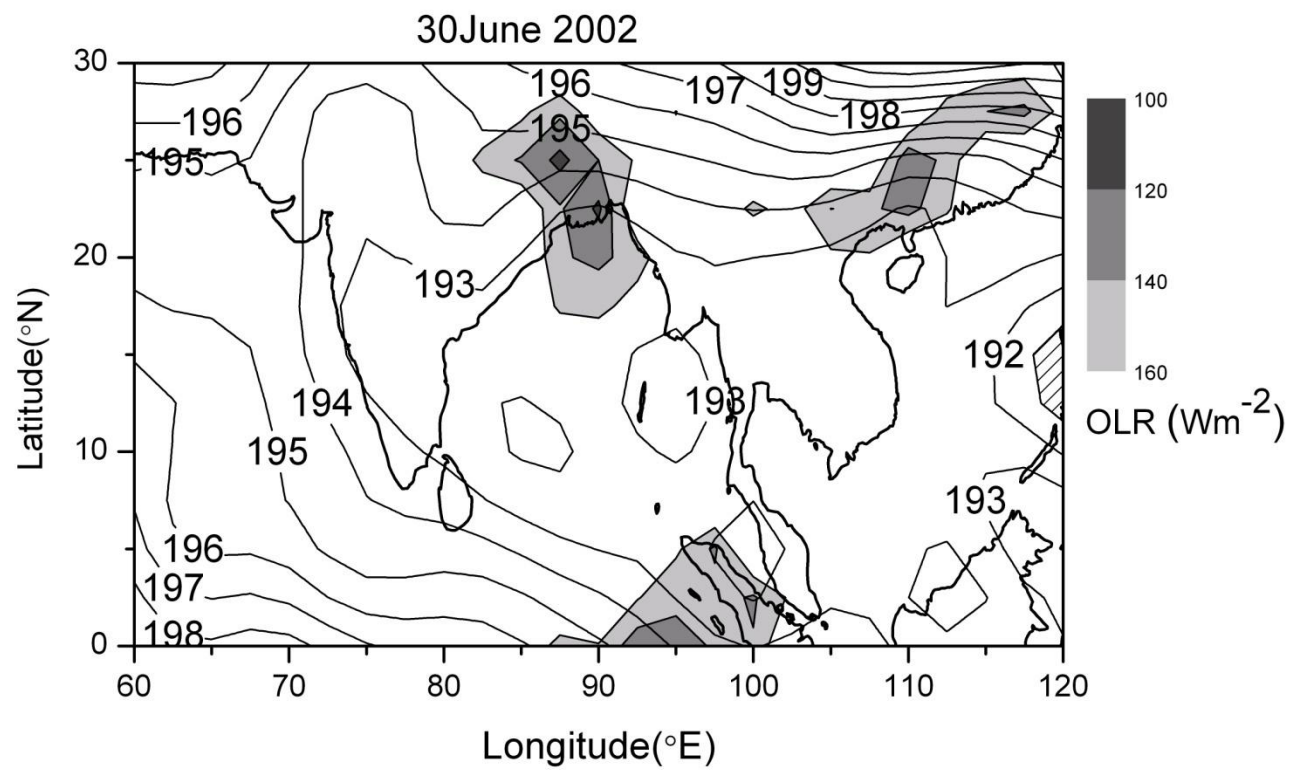

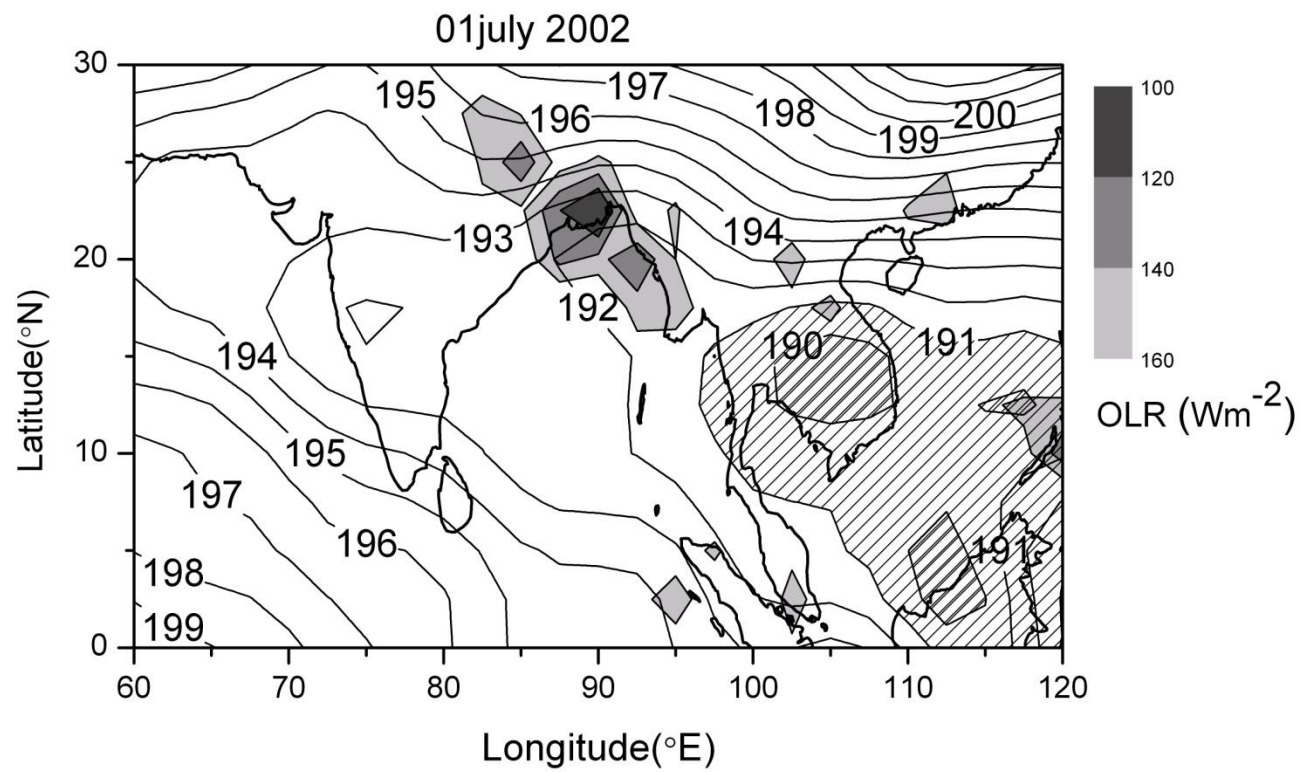

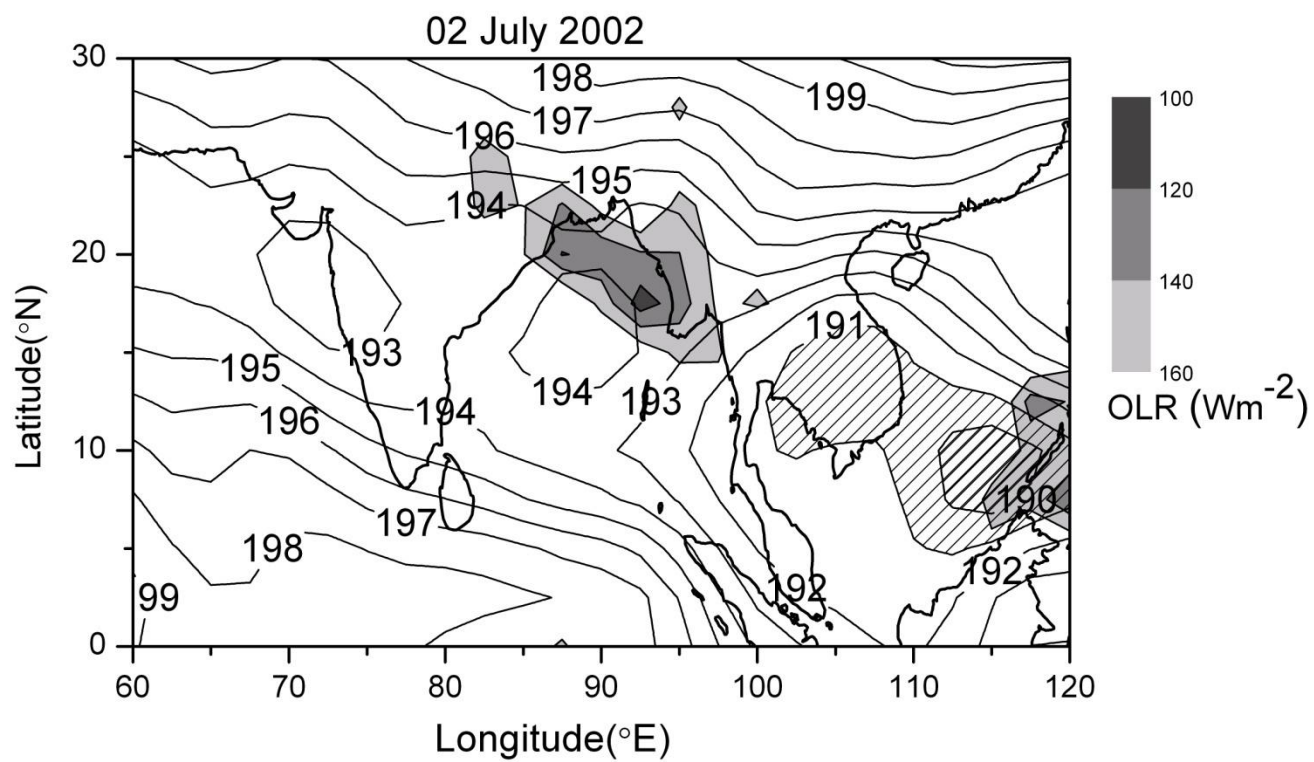

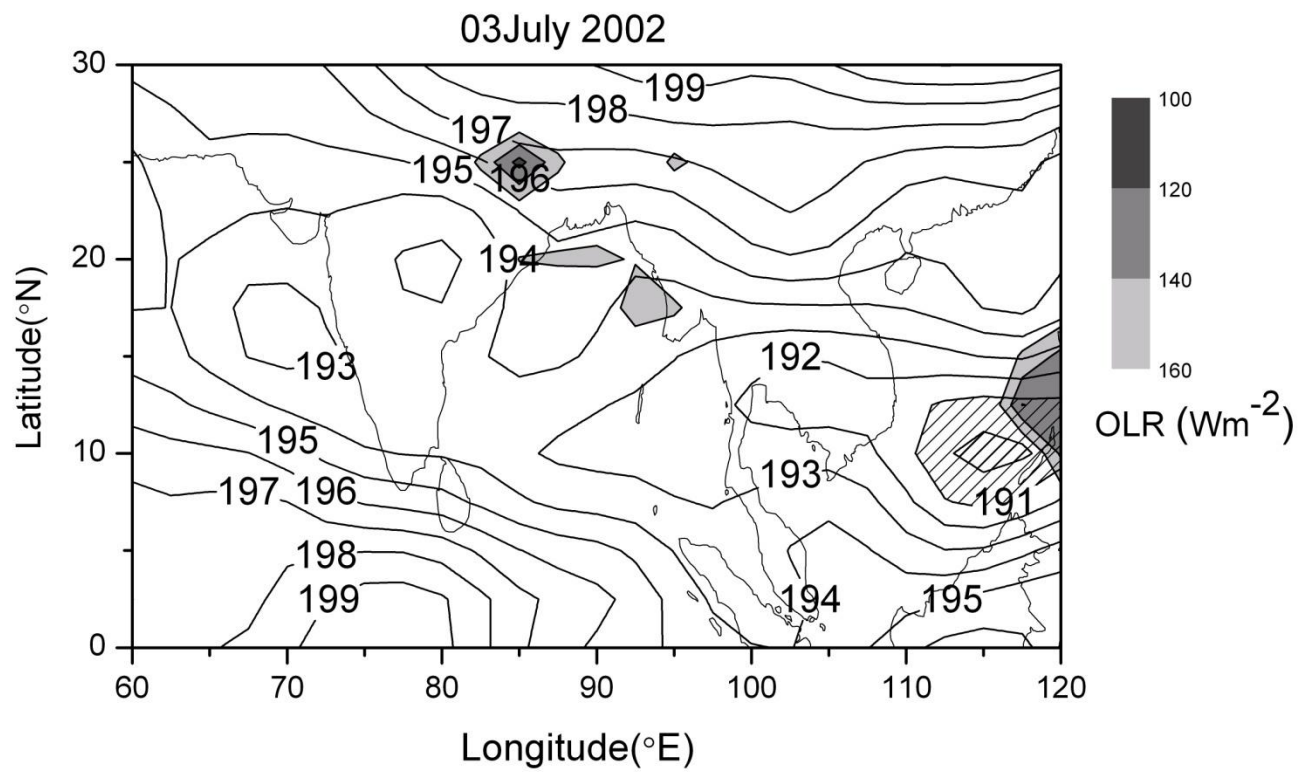

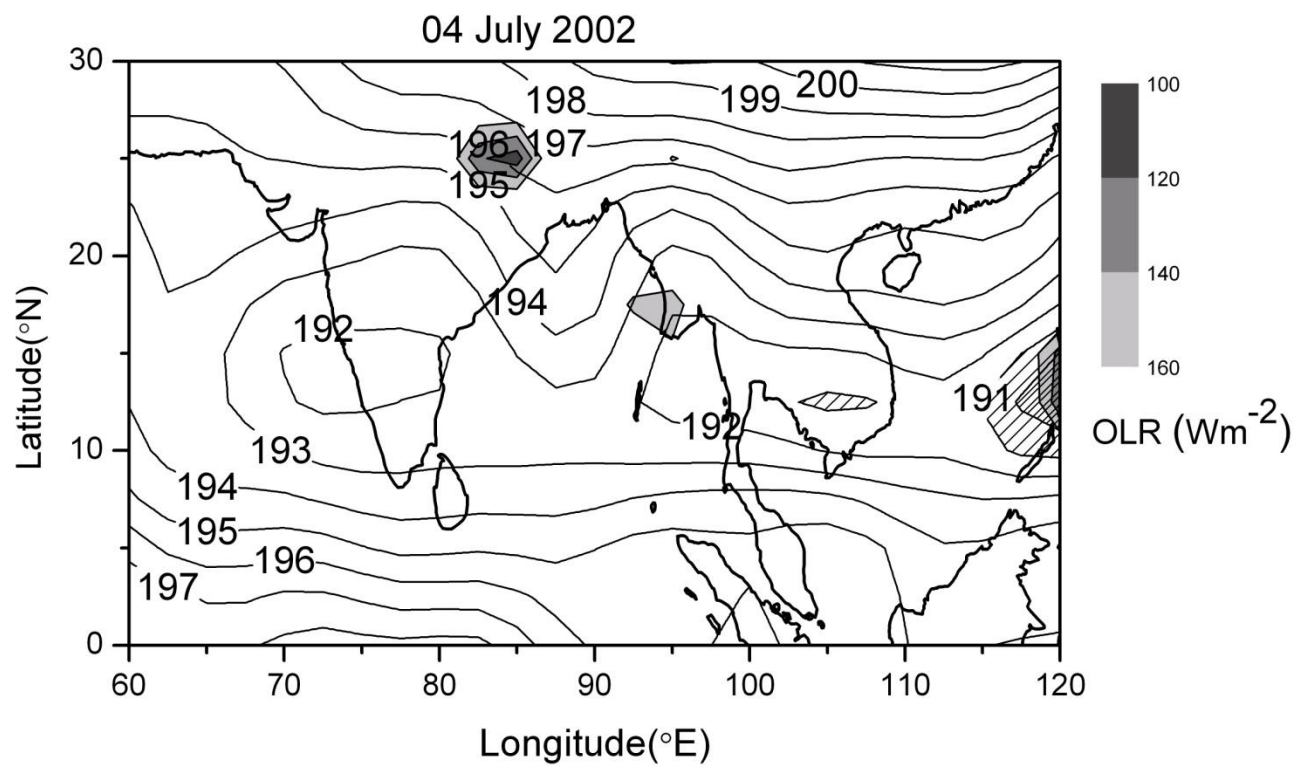

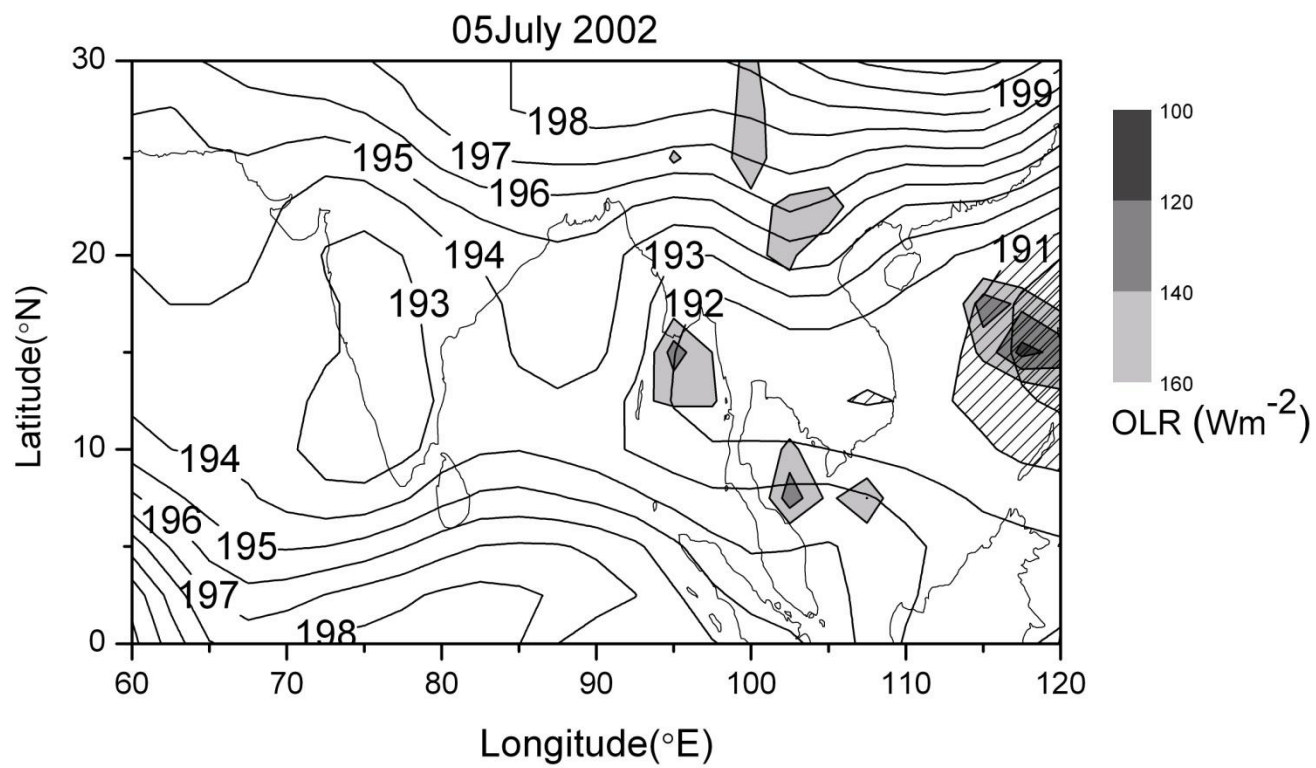

06 July 2002

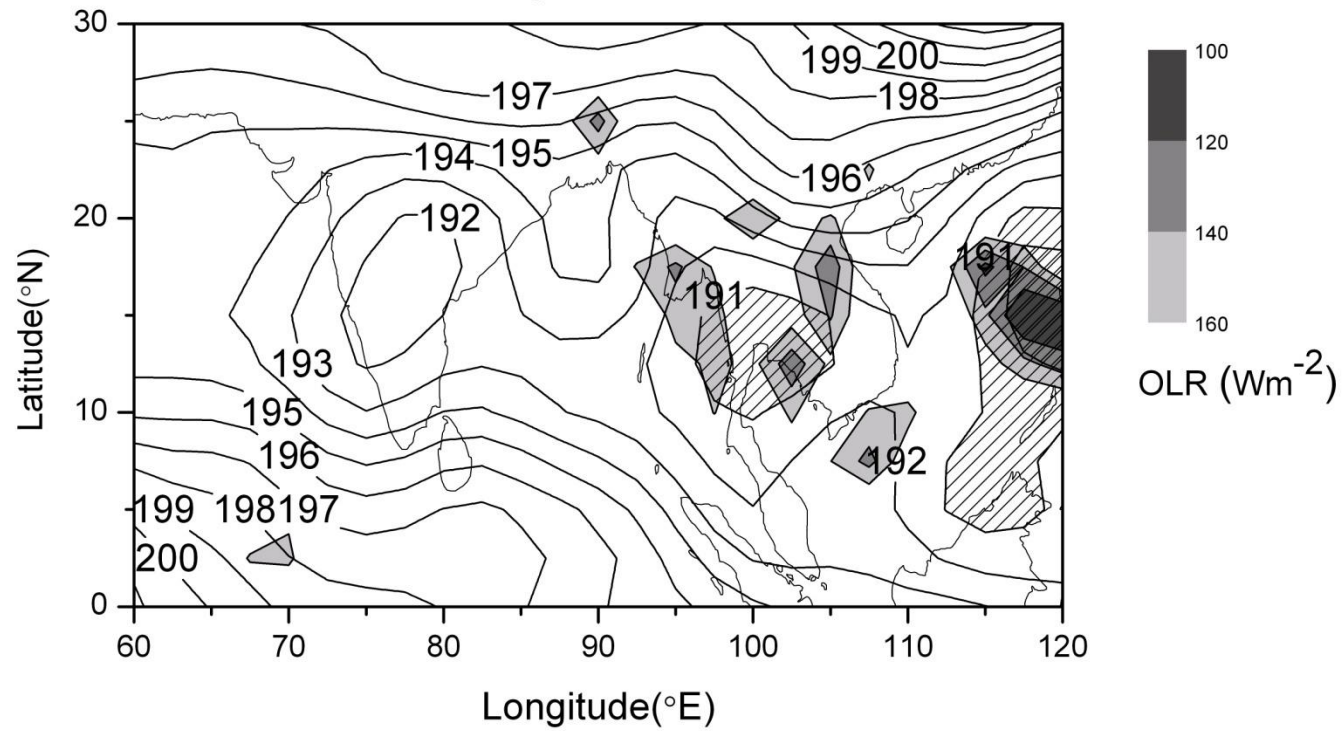

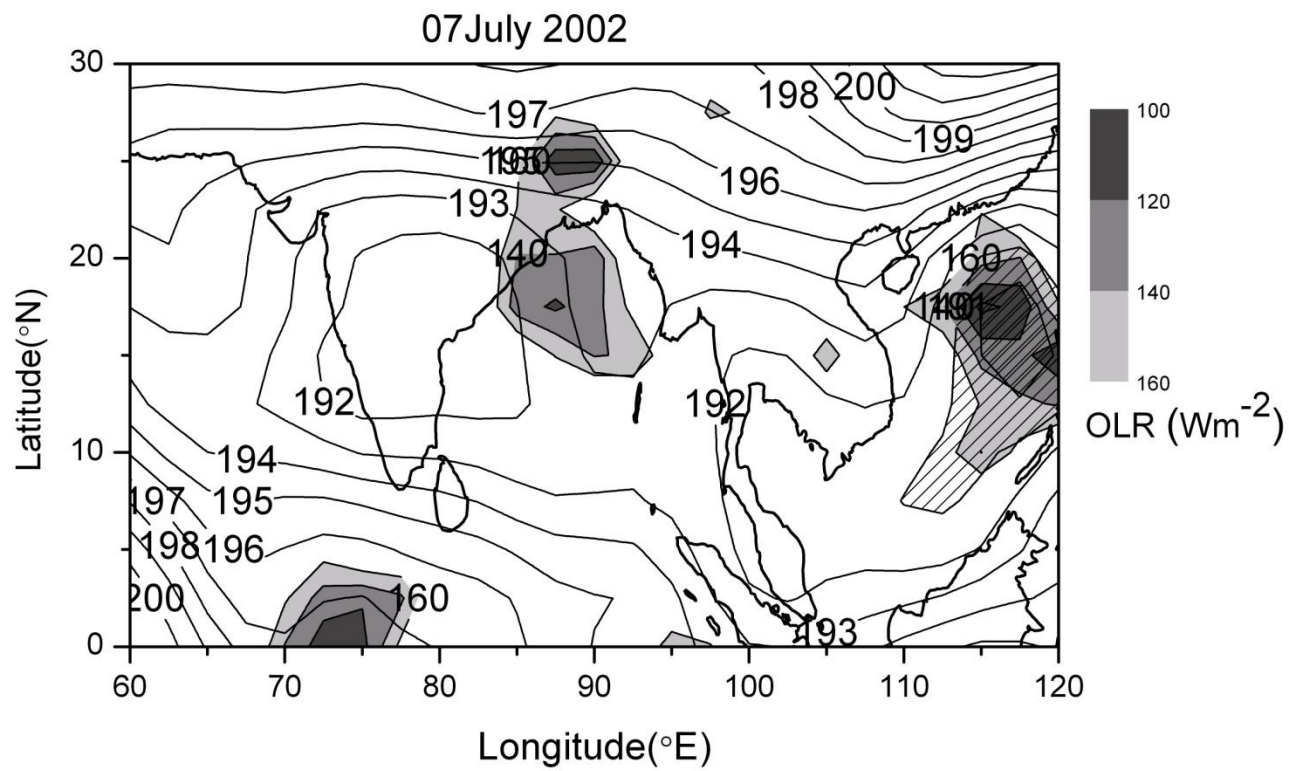

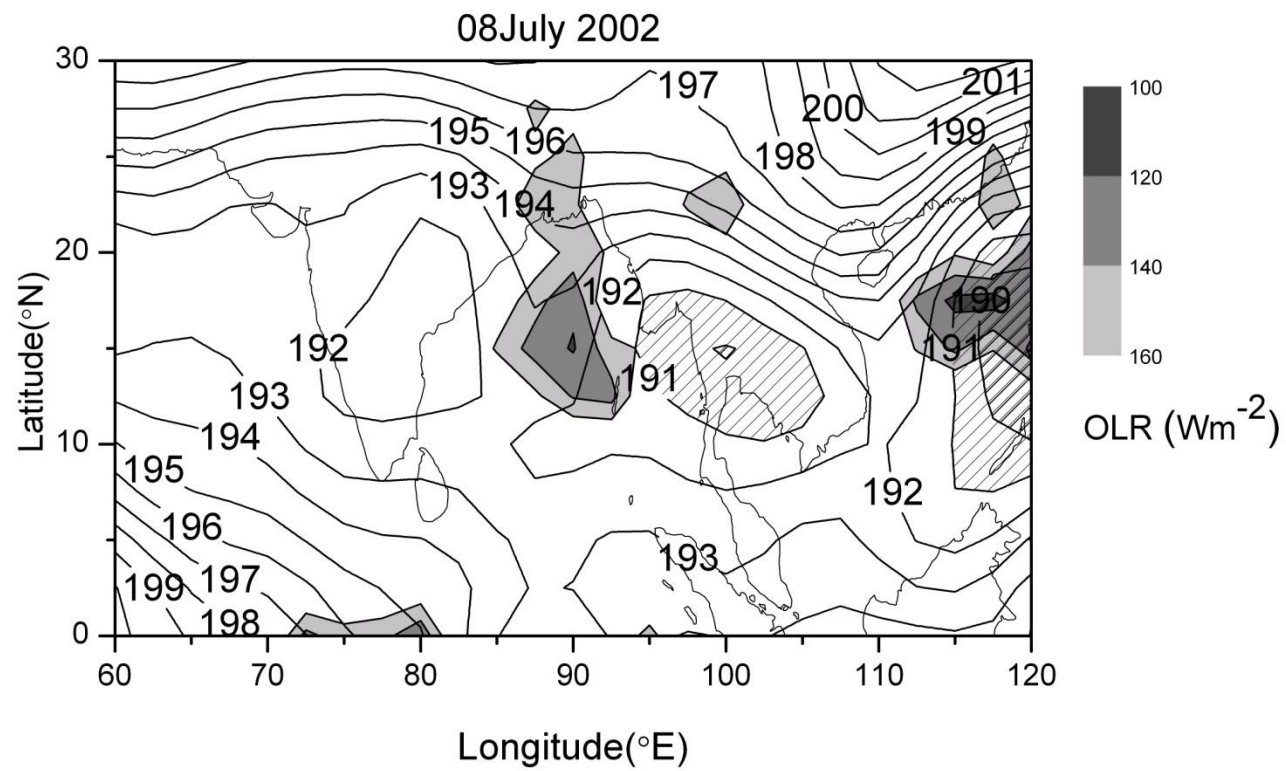

09 July 2002

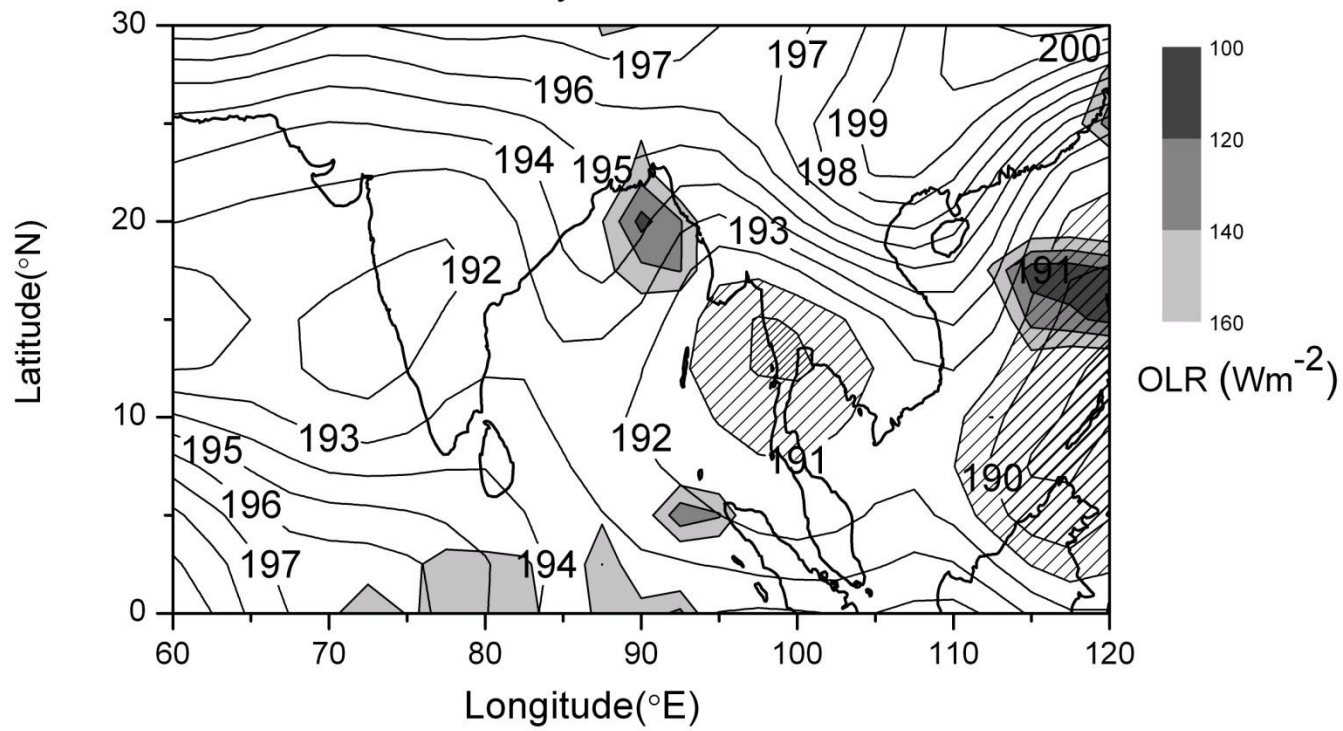

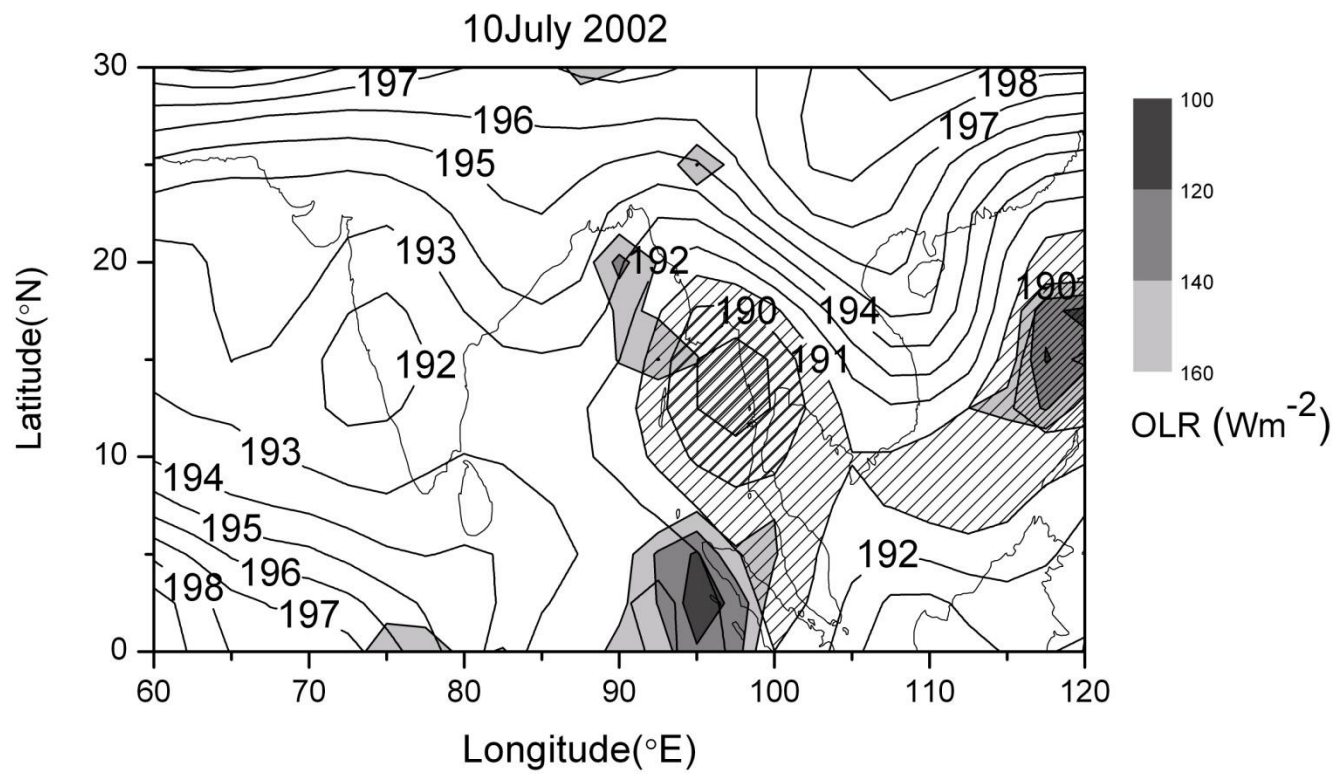

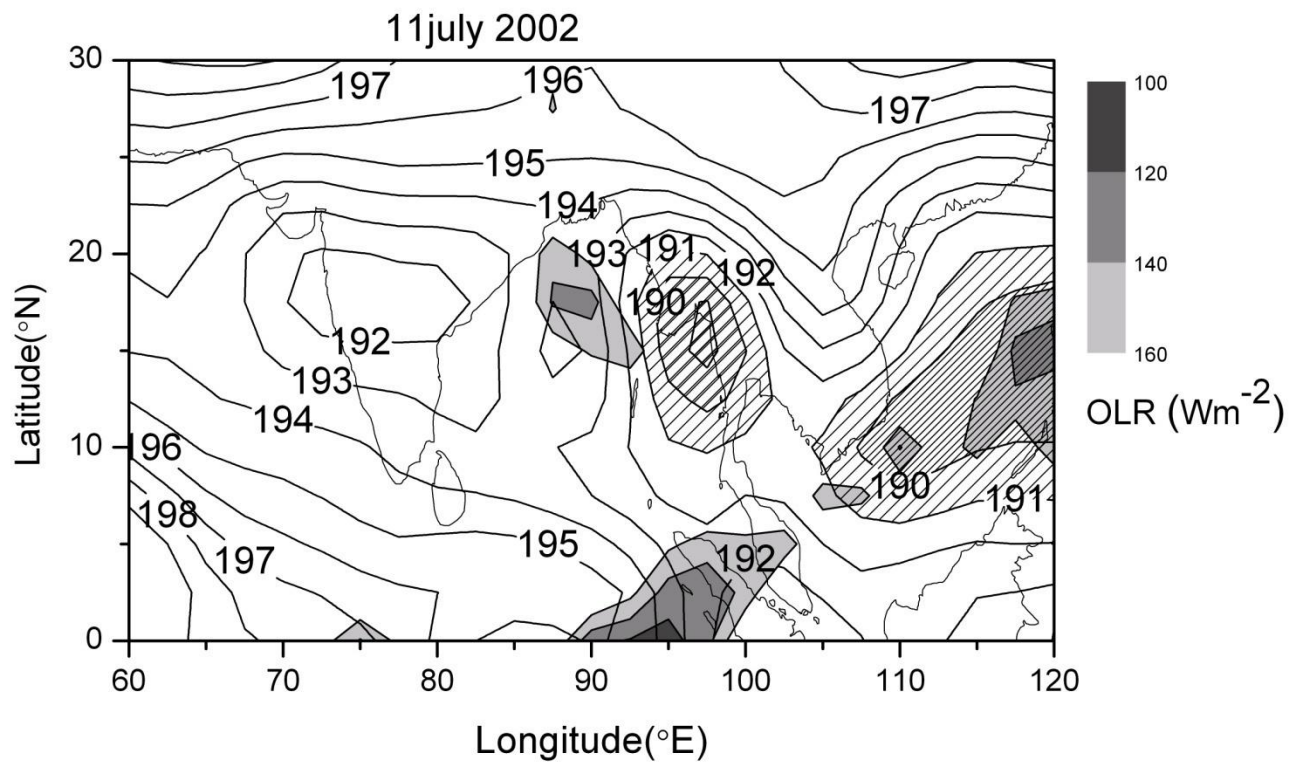

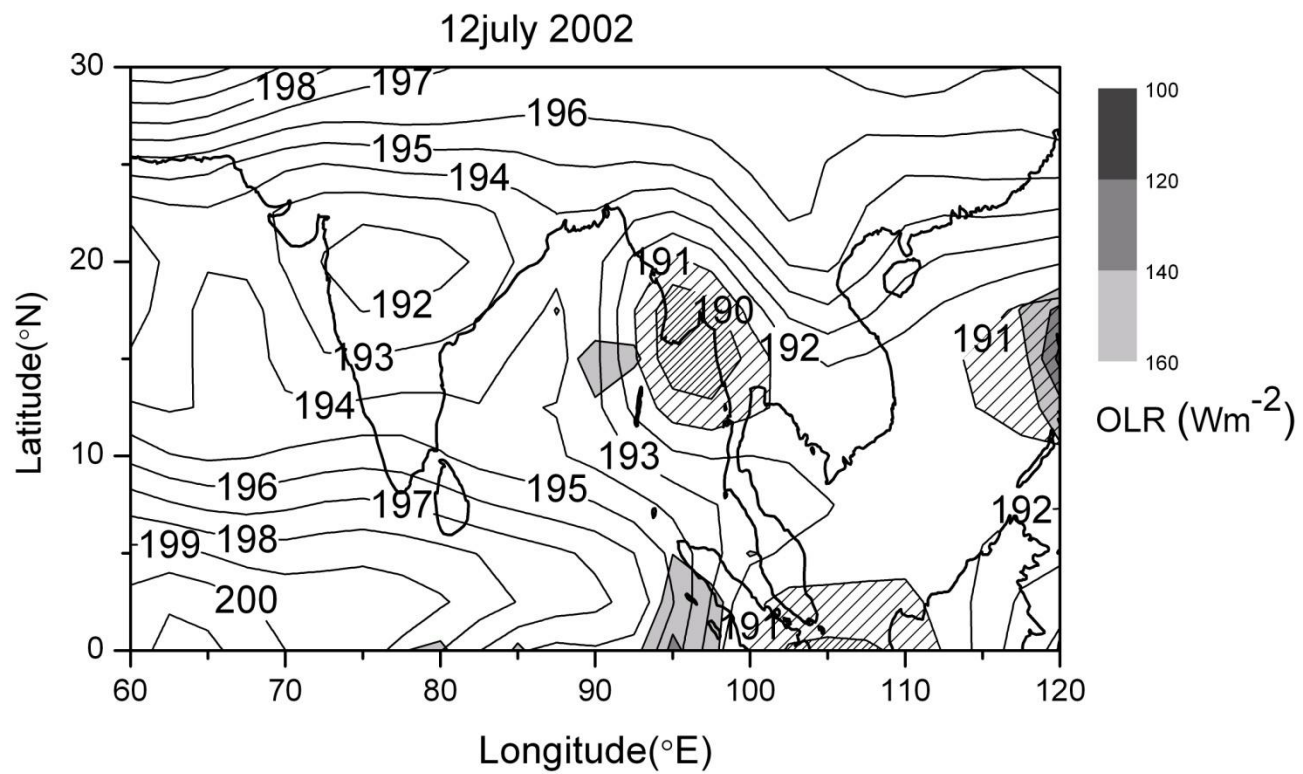

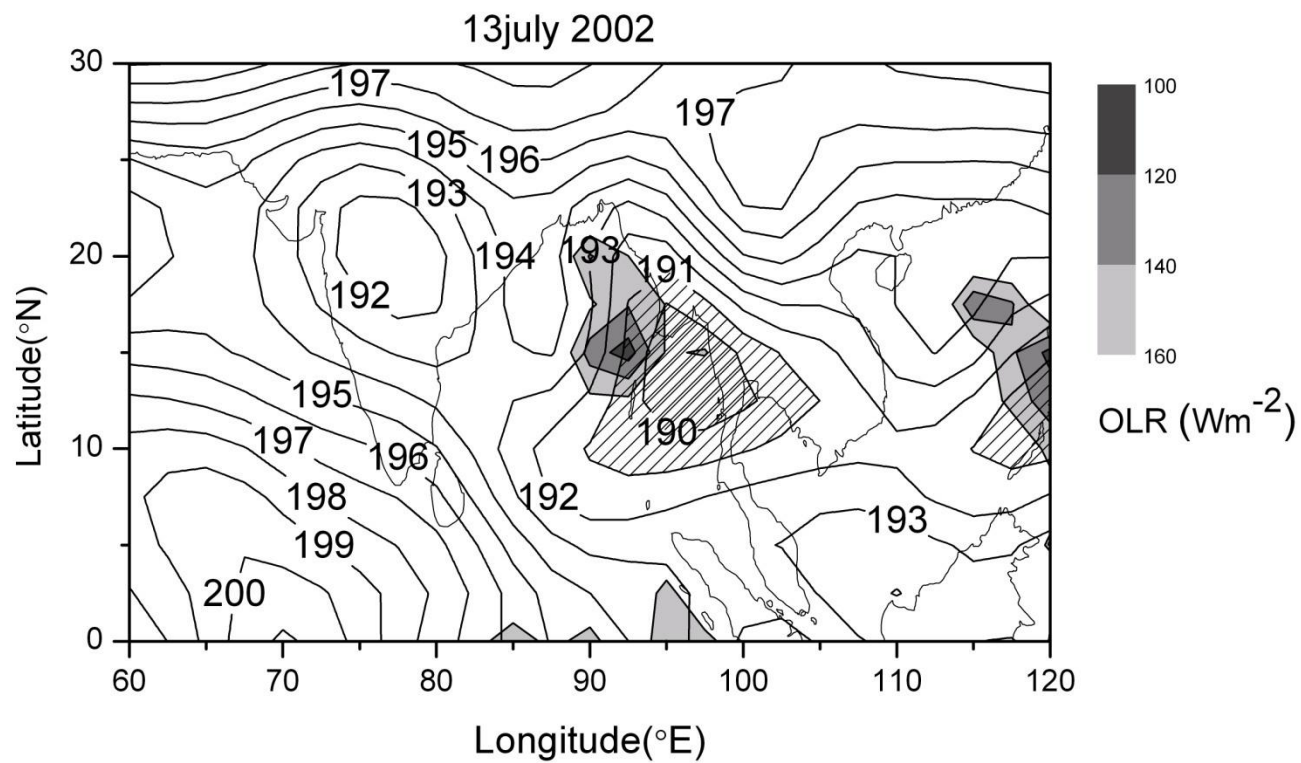

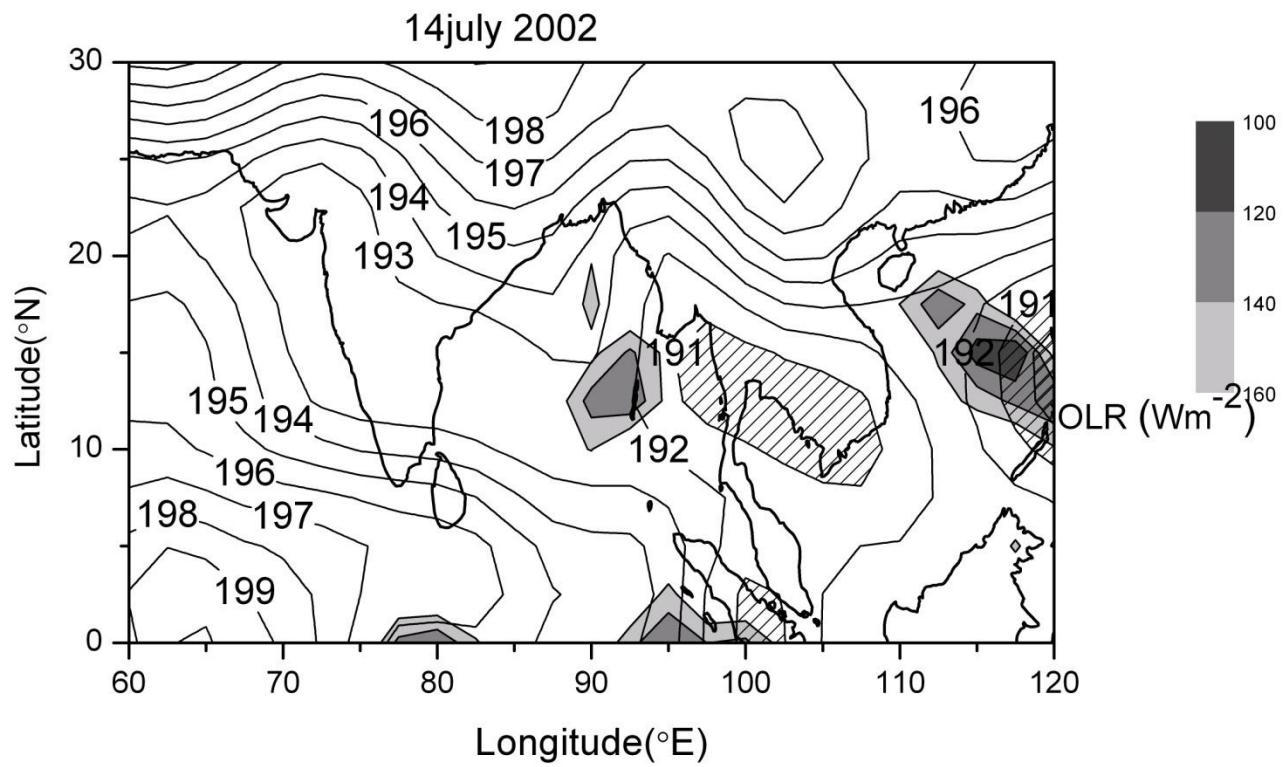

15 July 2002

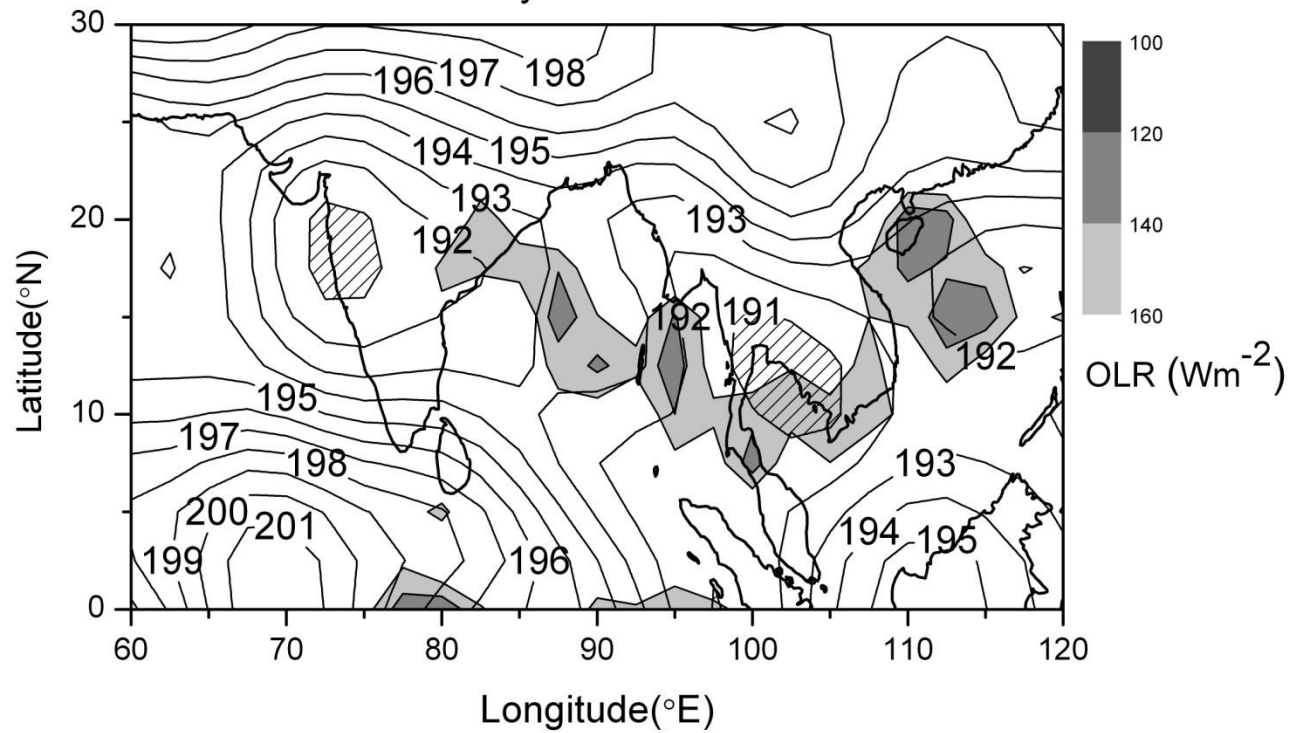

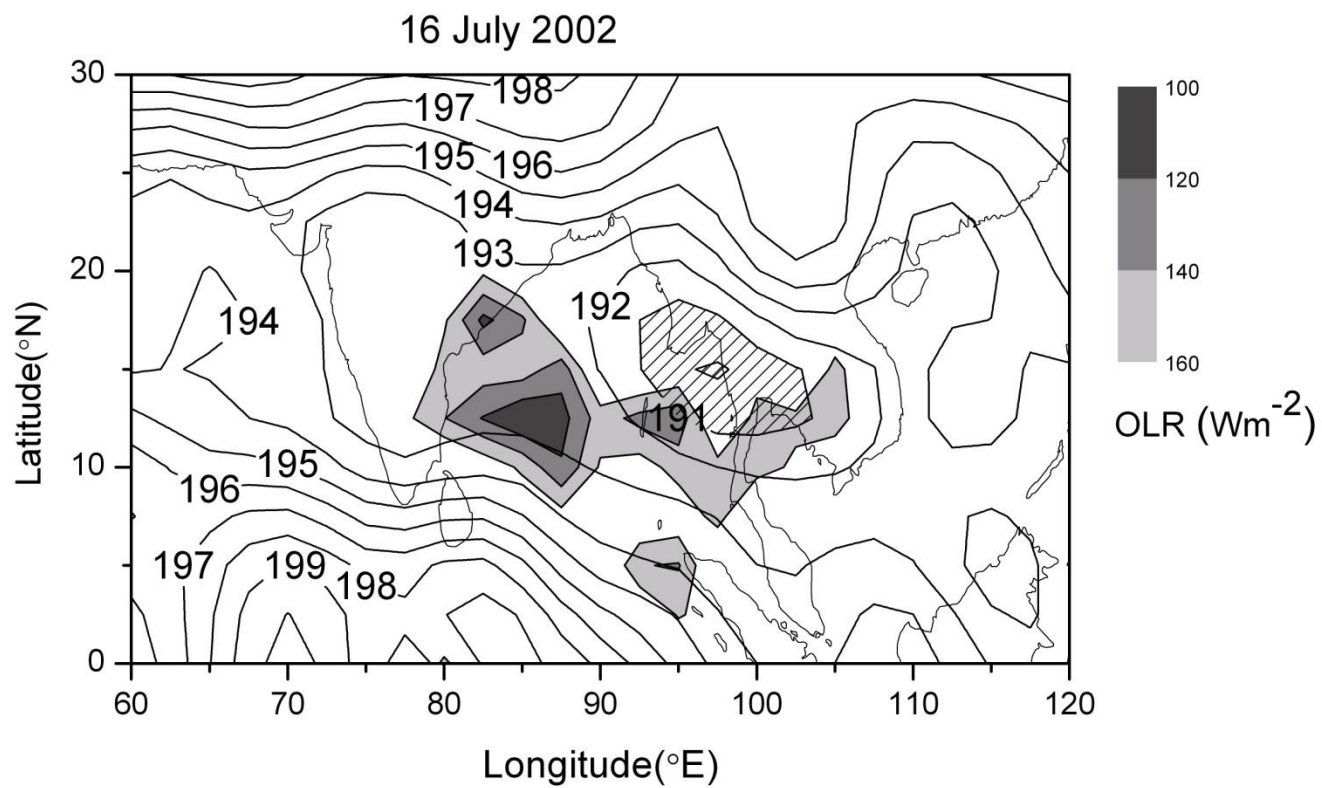

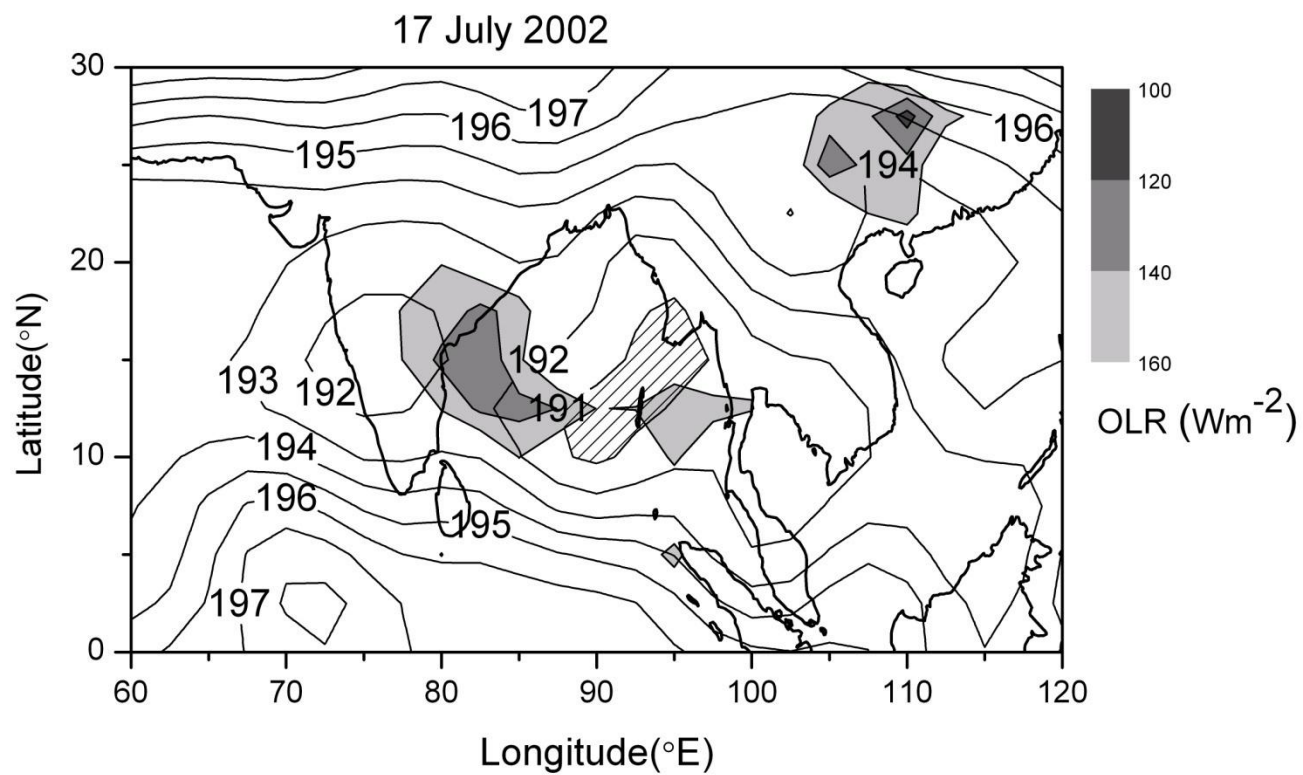

25 July 2002

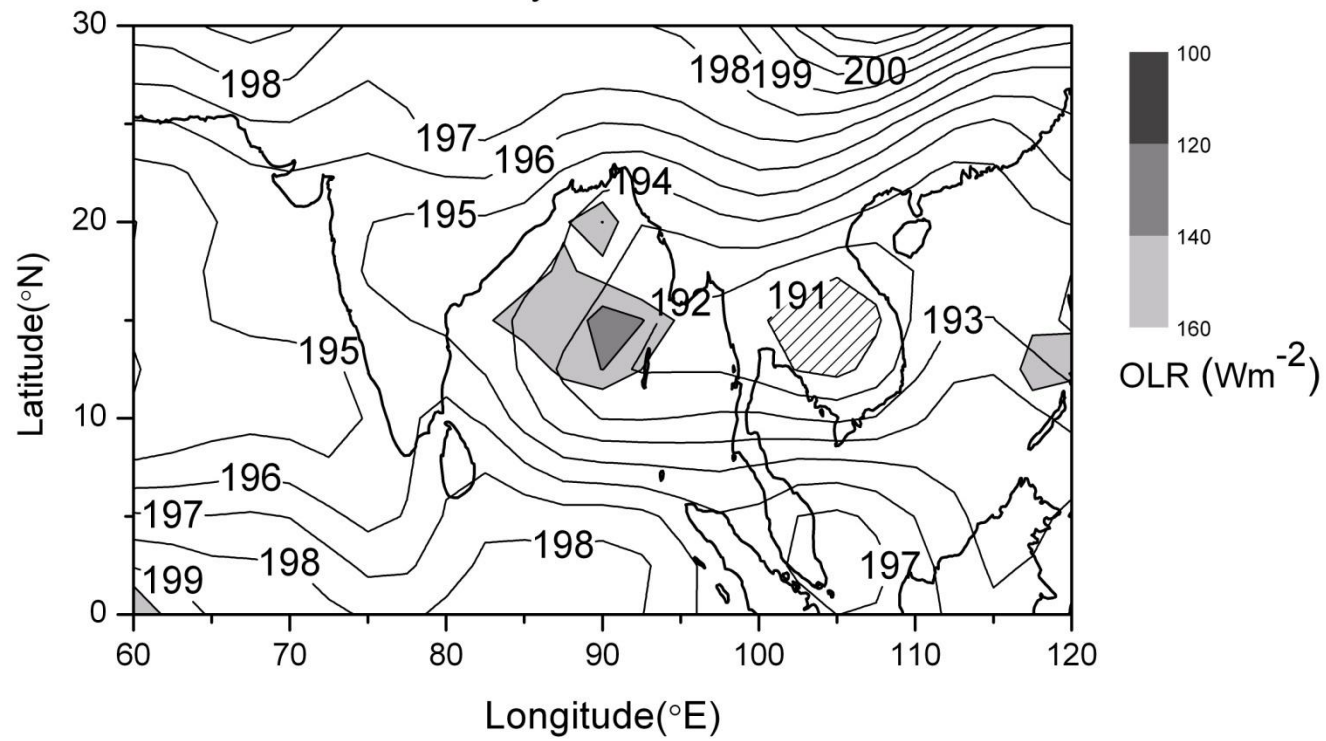

27 July 2002

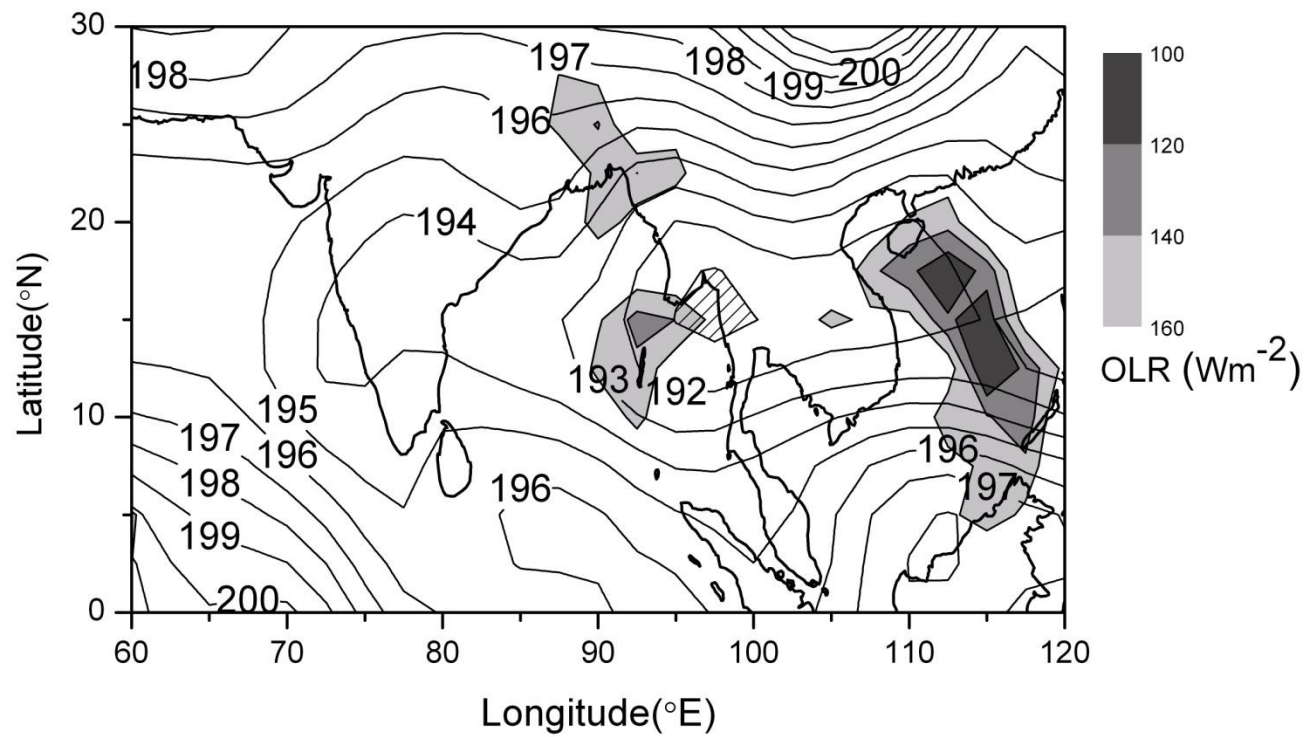

28 July 2002

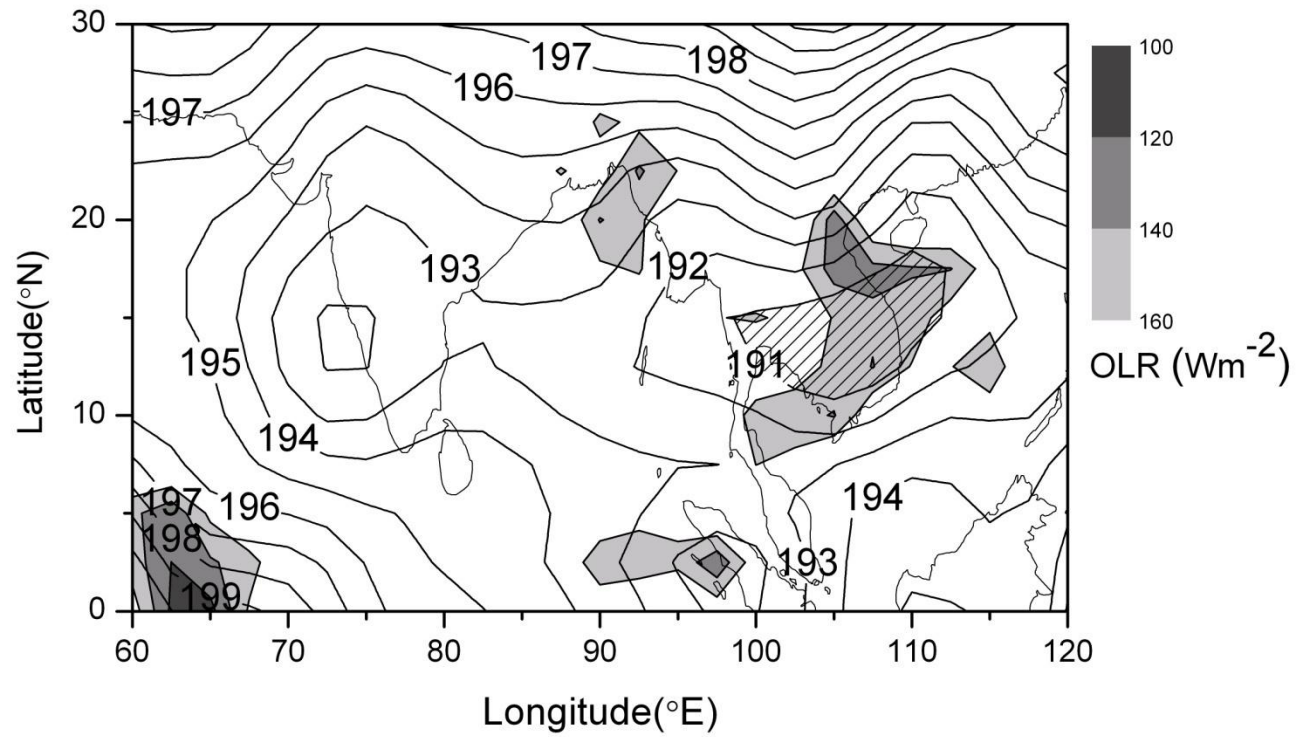

29 July 2002

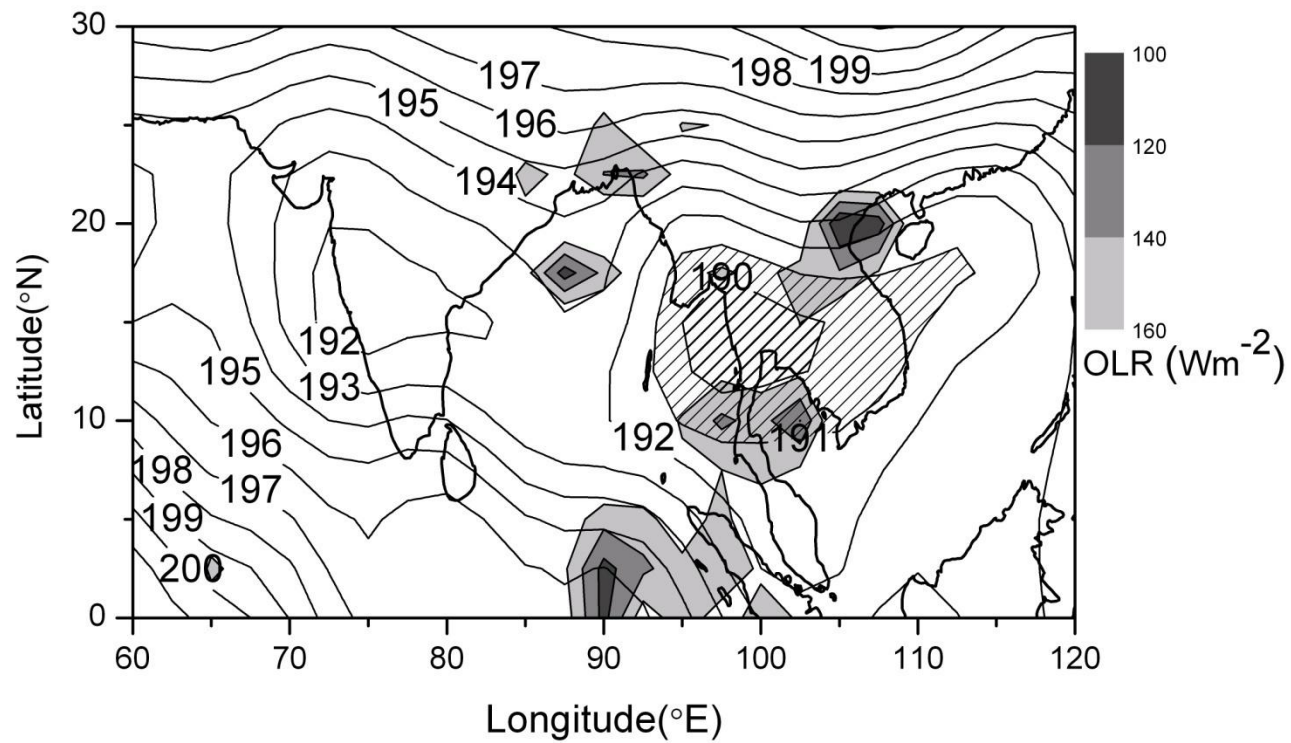

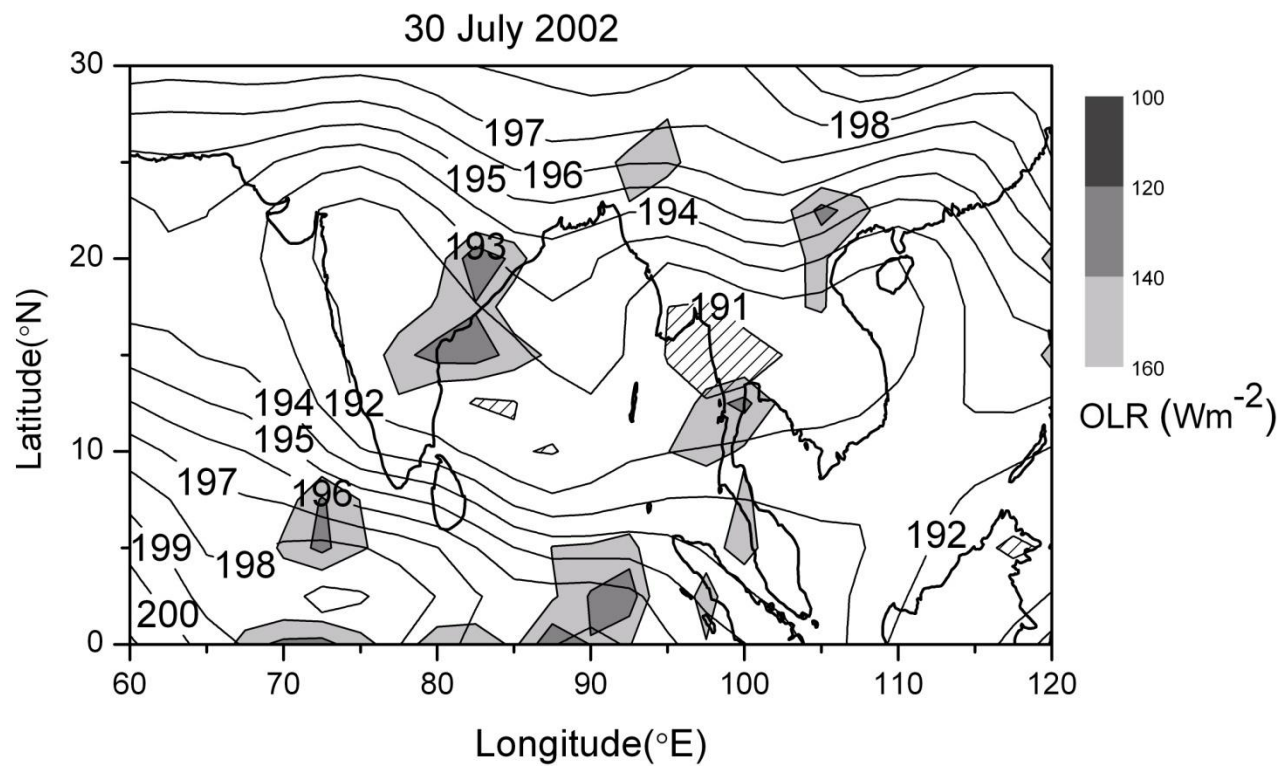

31 July 2002

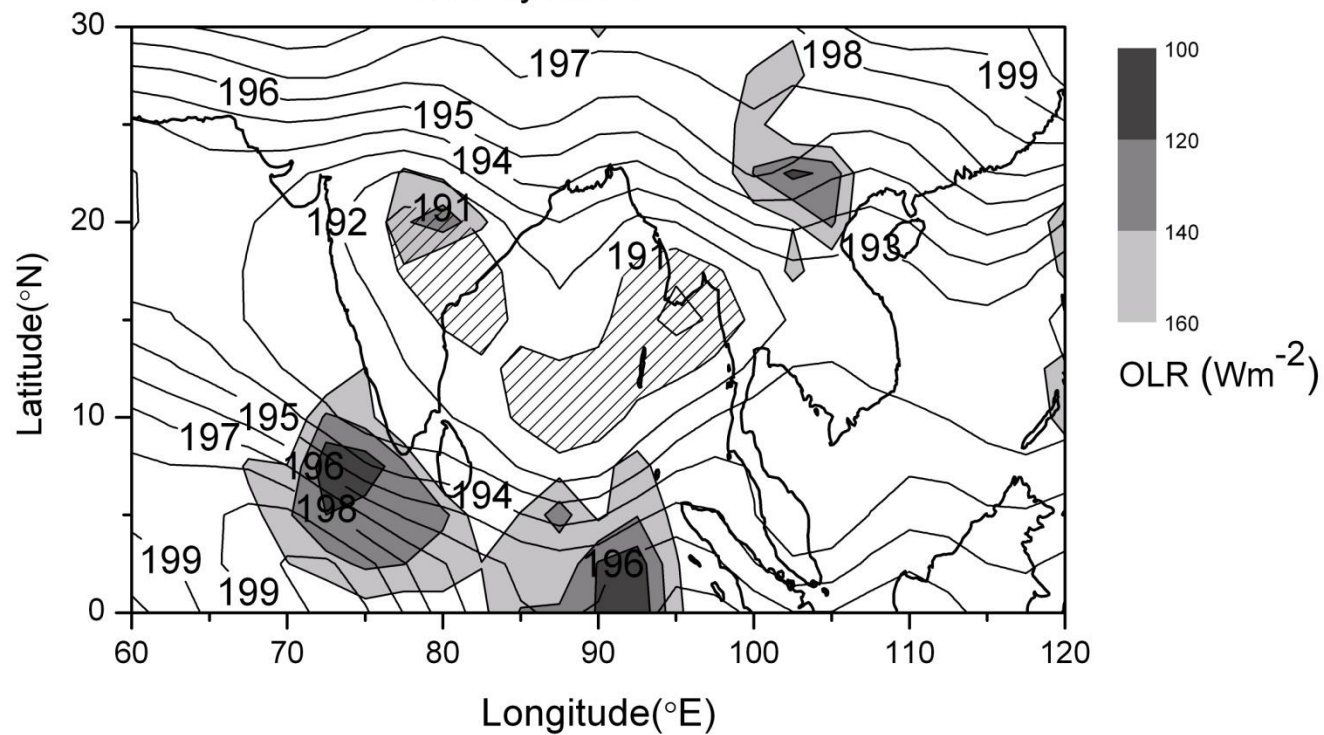

02 Aug. 2002

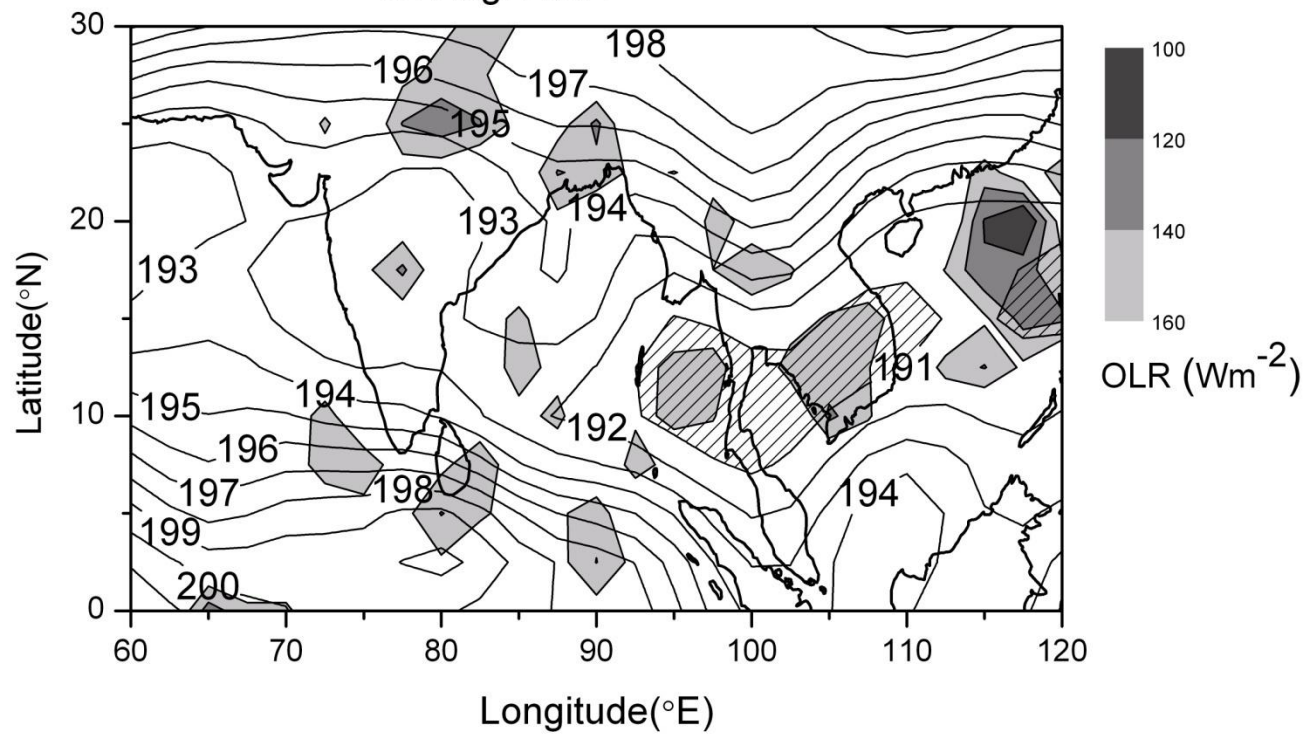

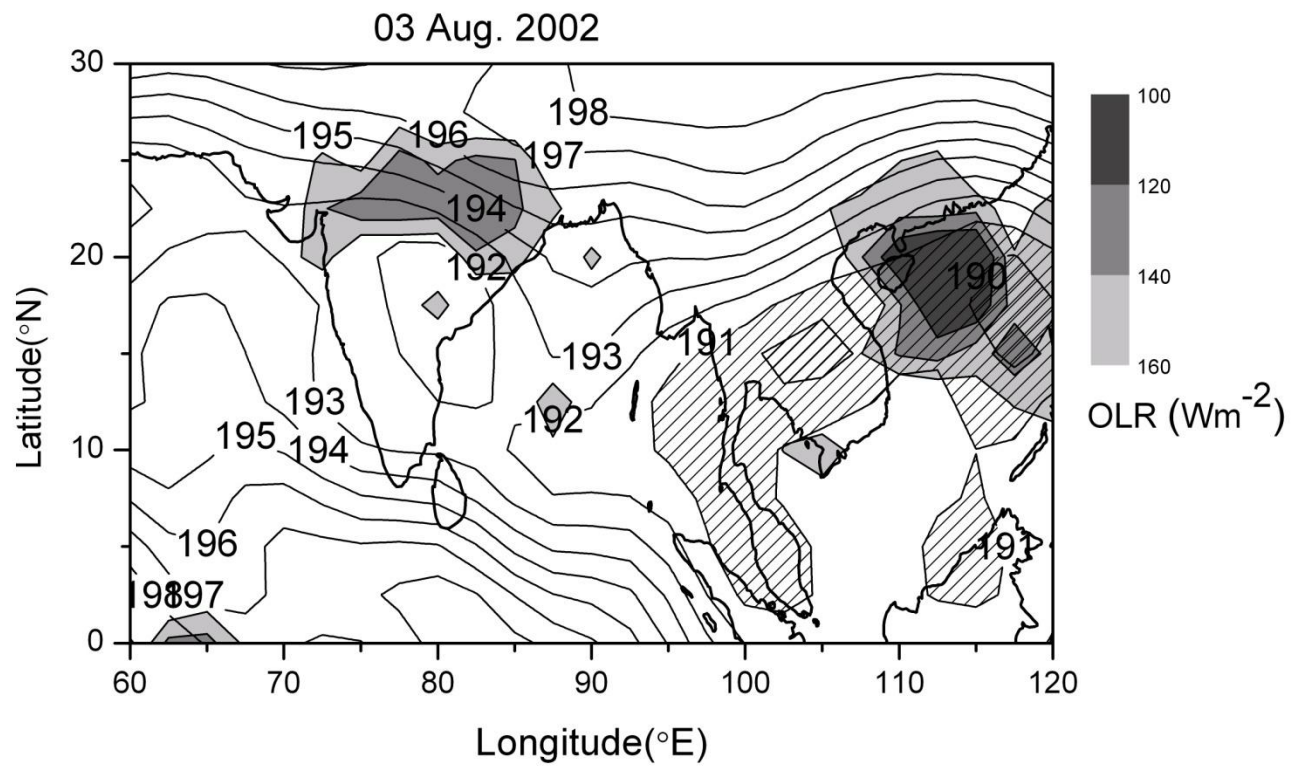

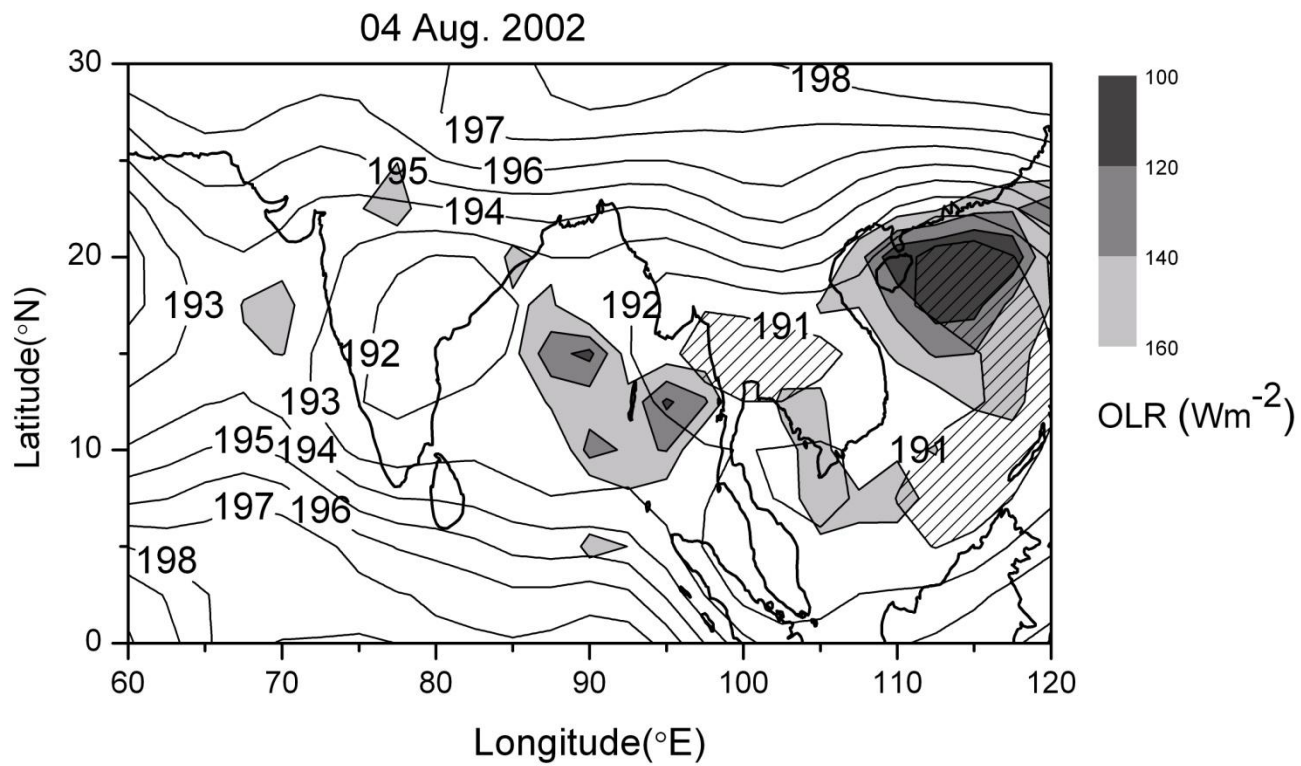

07 Aug. 2002

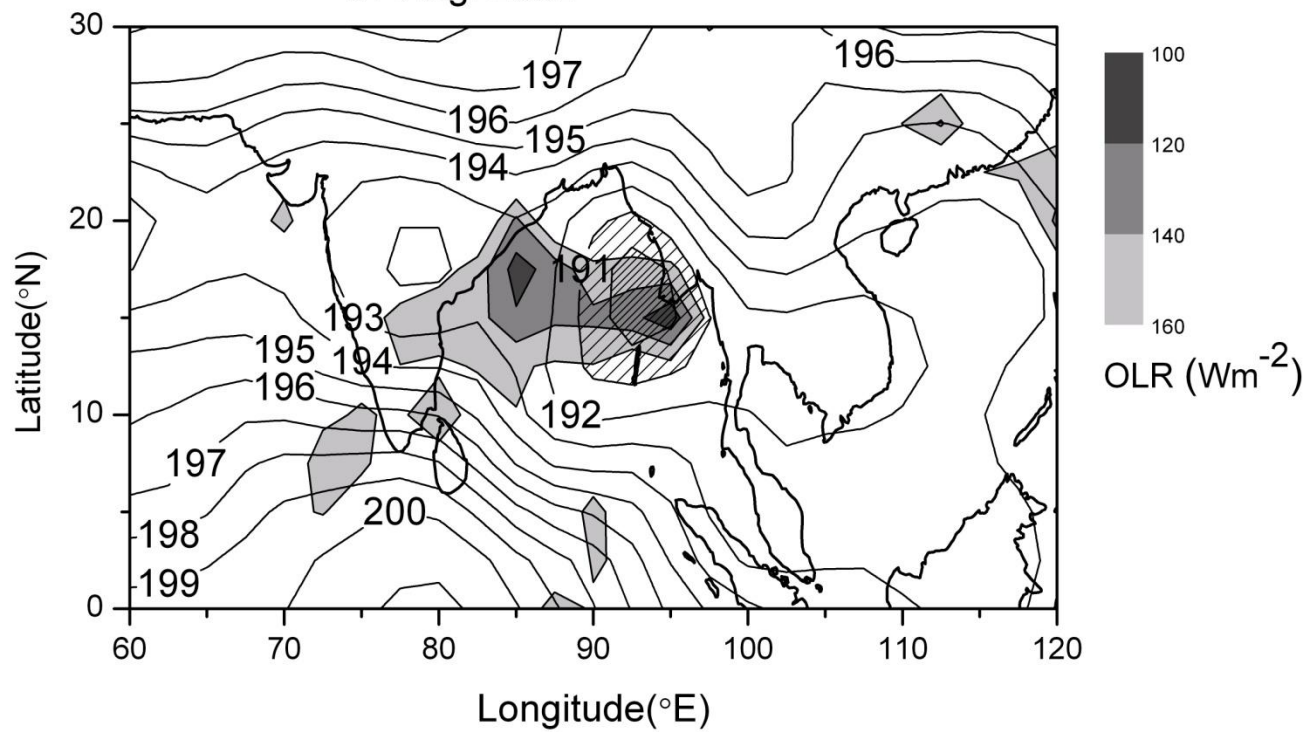

10 Aug. 2002

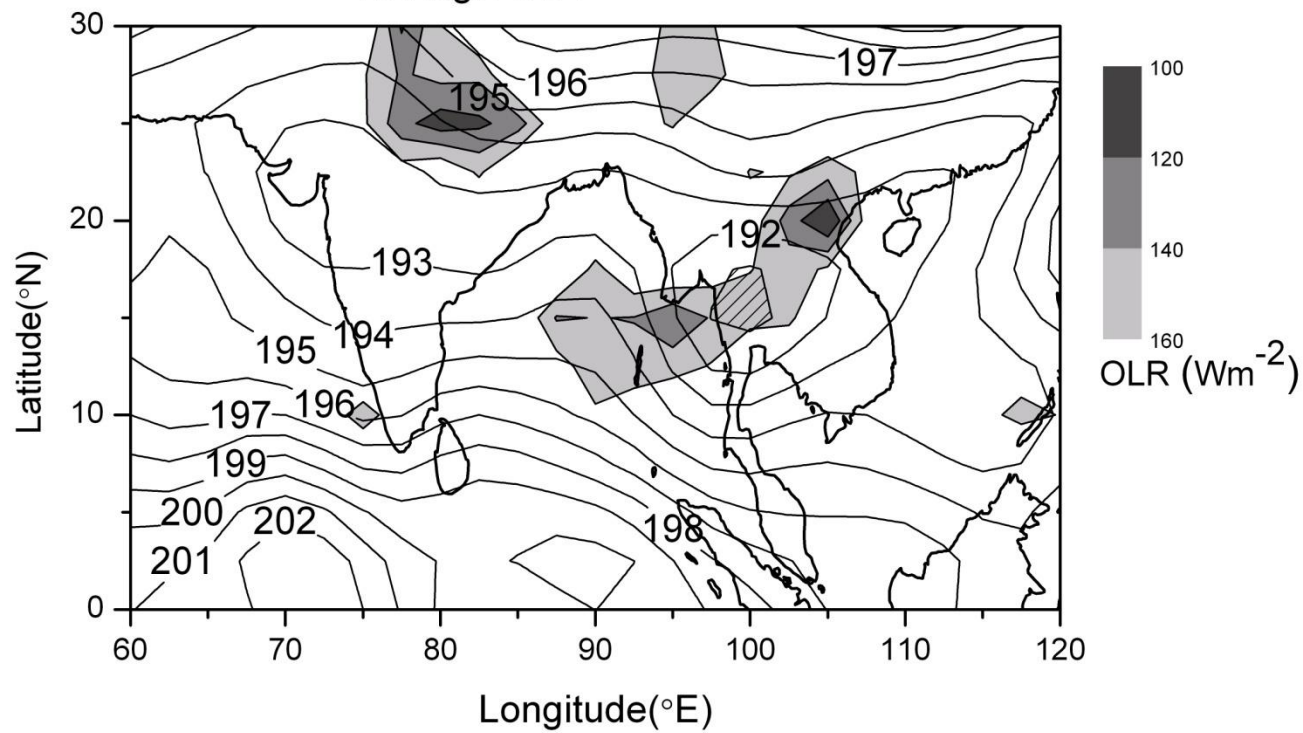

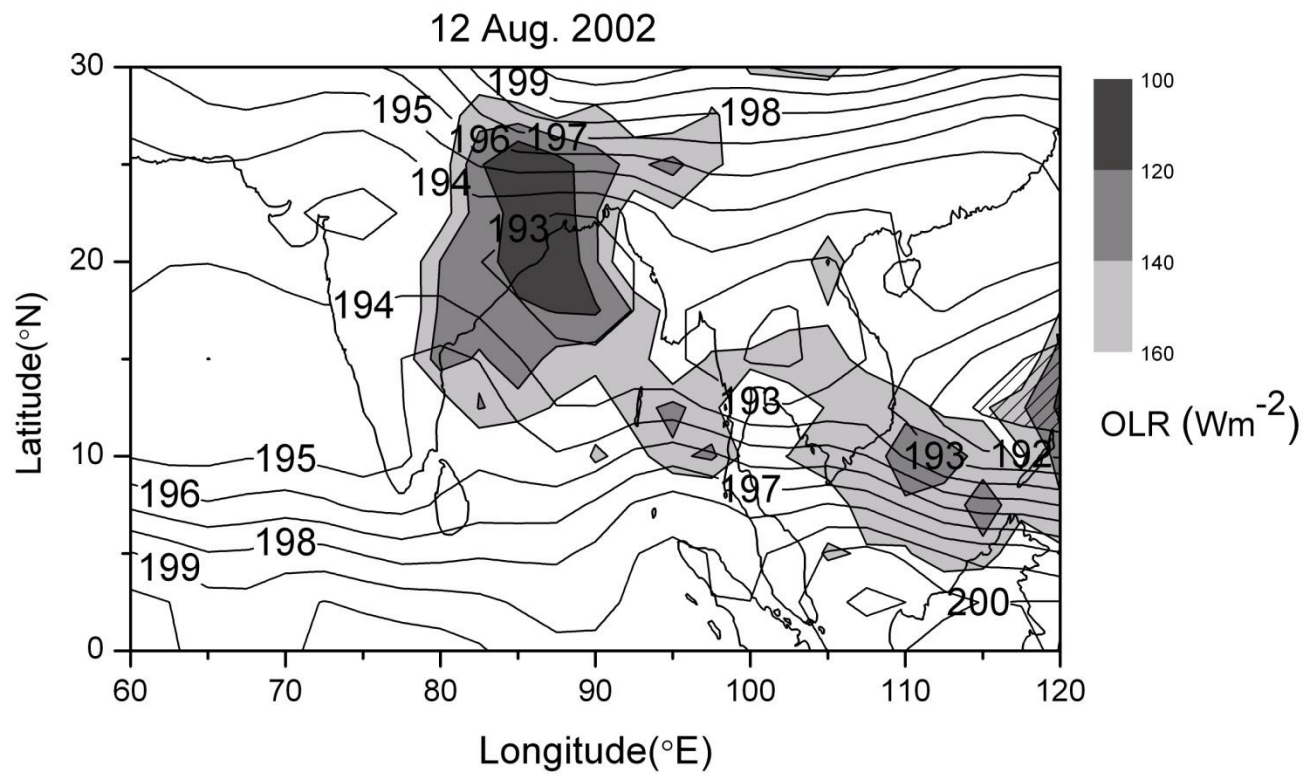

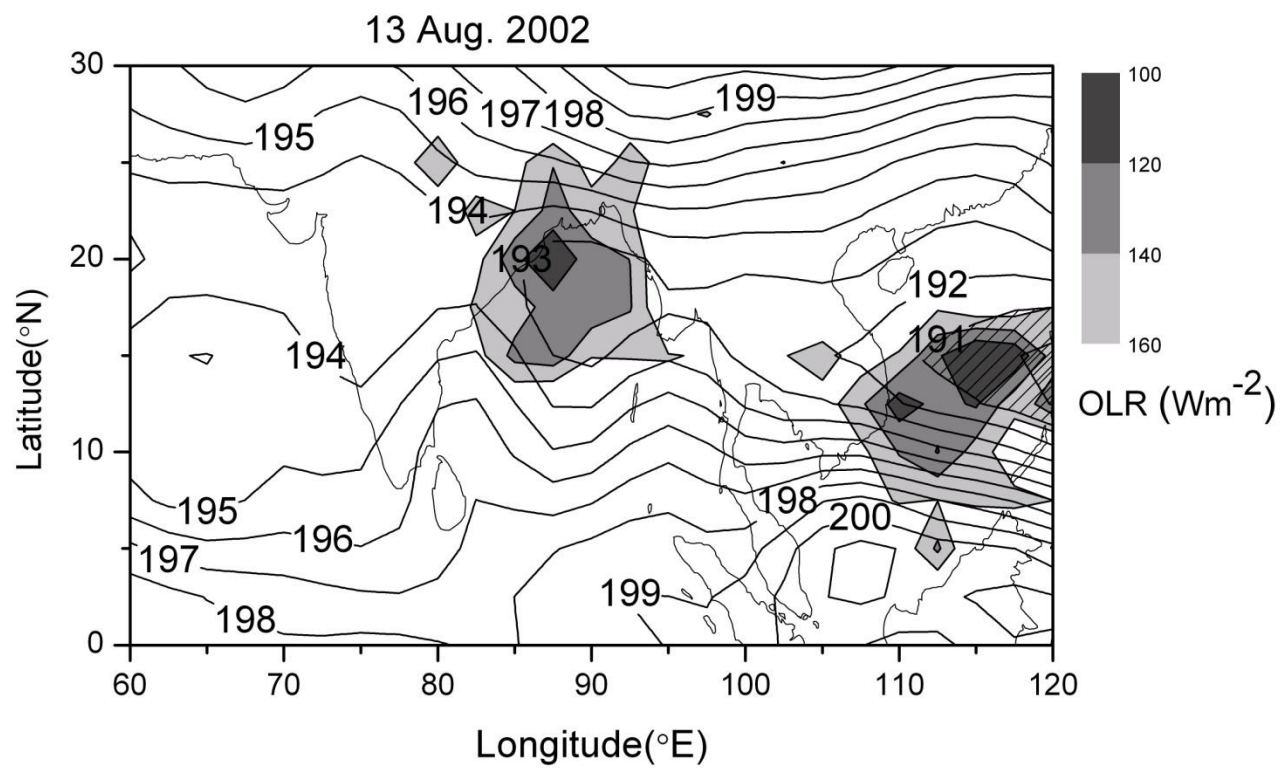

14 Aug. 2002

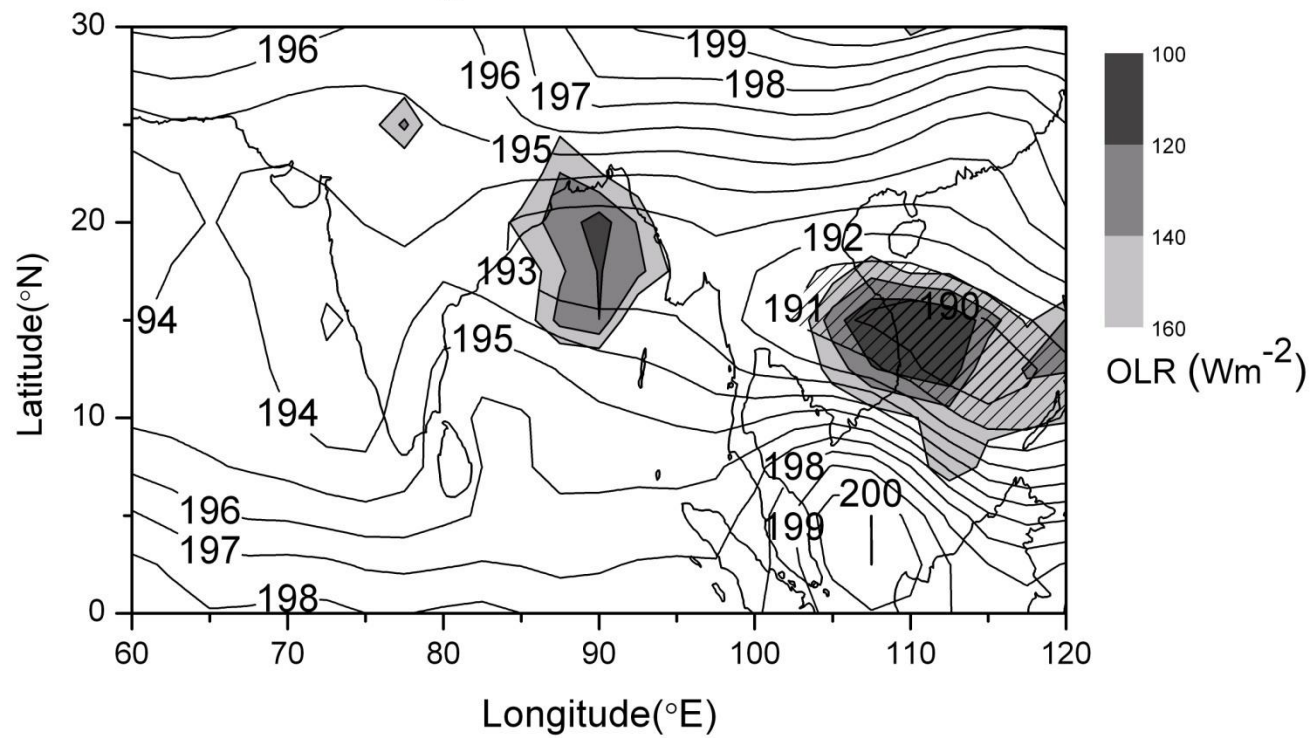

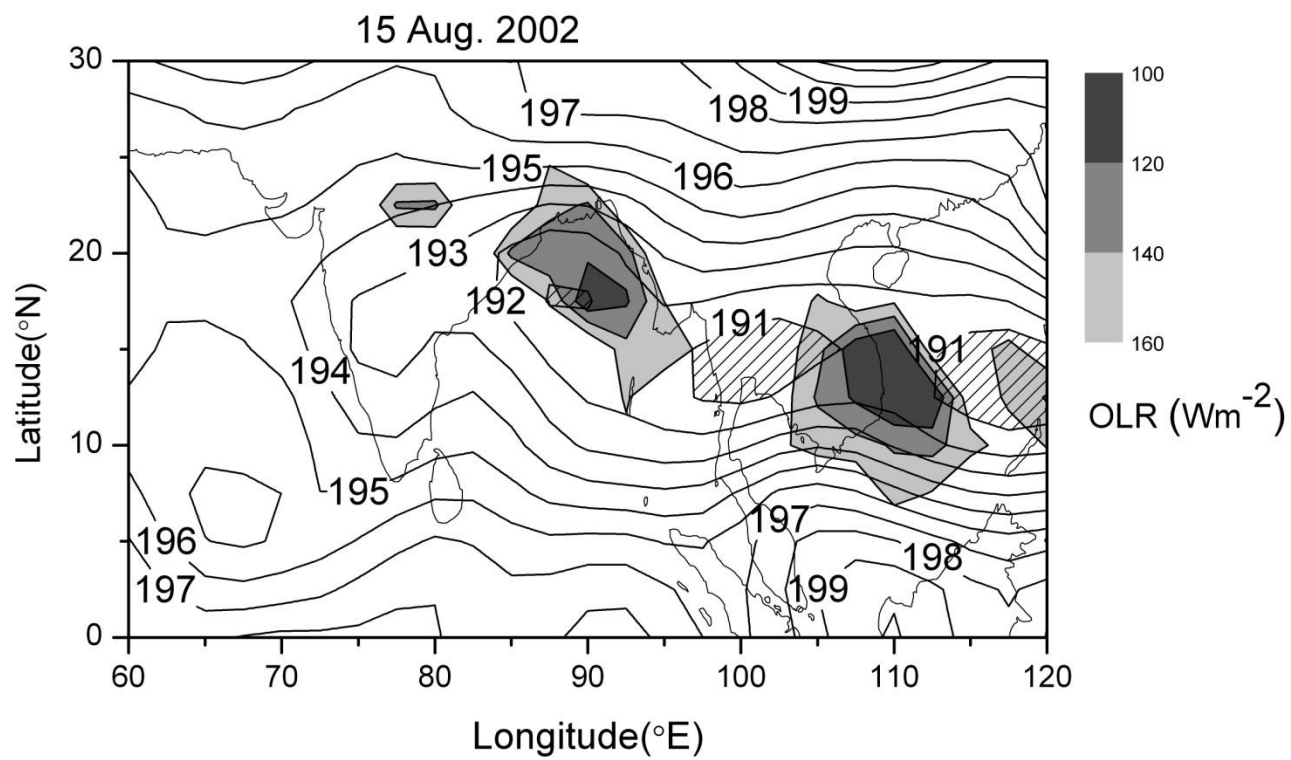

Supplement: Supplementary file 1 [file angeo-28-927-2010-supplement.zip › Supplemantary Material/Auxiliary Material File 1.pdf]
