# Supplementary material for: Mesoscale convection system and occurrence of extreme low tropopause temperatures: observations over Asian summer monsoon region
Source: Copernicus journal article supplement (doi:10.5194/angeo-28-927-2010), 2010-04-12

## **Auxiliary Material File 2.**

Left hand side panels show satellite imageries drawn using 6 hourly ICSSP-DX data. Horizontal wind field at 100 hPa level, corresponding to each of the satellite imagery, from ECMWF reanalysis is superposed. Right hand side panels show contour maps of temperature field at 100 hPa level. Resolution of ECMWF reanalysis data presented in these pictures is  $2.5^{\circ}\times 2.5^{\circ}$ .

Period: 24 August 1999, 00GMT to 28 August 1999, 18 GMT.

Simultaneous movement of the cloud and low temperature system under the influence of the horizontal winds is evident.

ISCCP.DX.1.MET-5.1999.08.24.0000

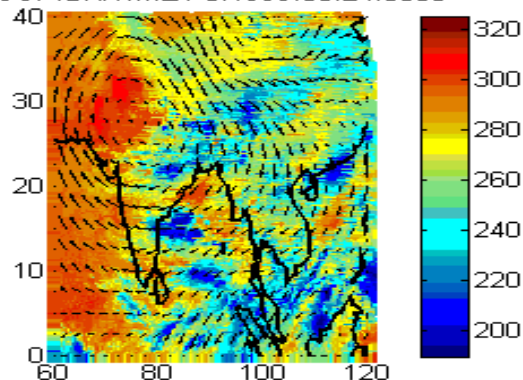

Air Temperature at 100mb

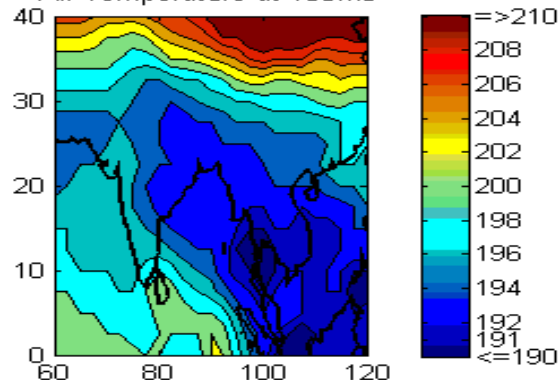

ISCCP.DX.1.MET-5.1999.08.24.0600

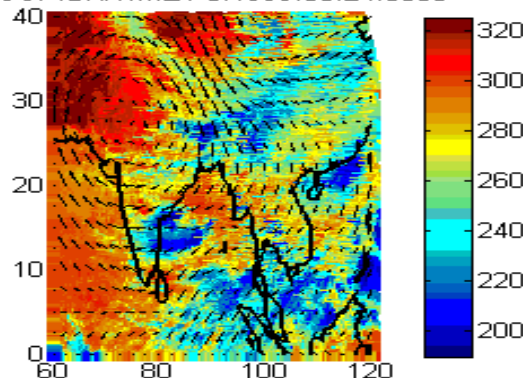

Air Temperature at 100mb

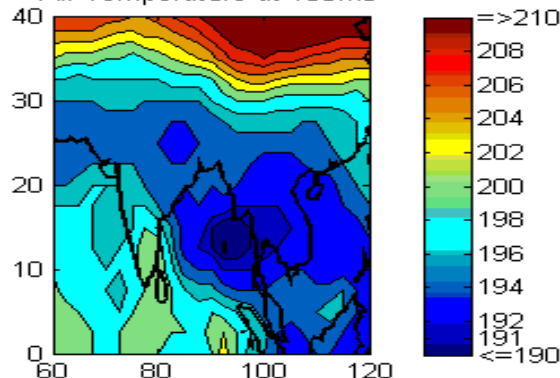

ISCCP.DX.1.MET-5.1999.08.24.1200

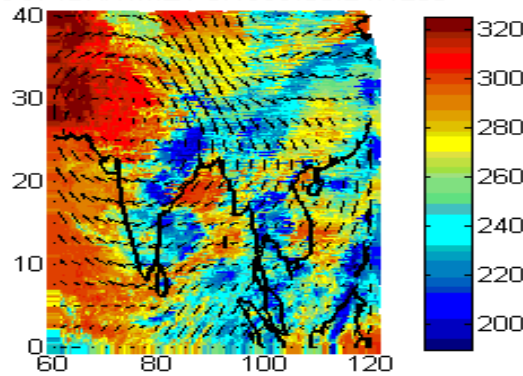

Air Temperature at 100mb

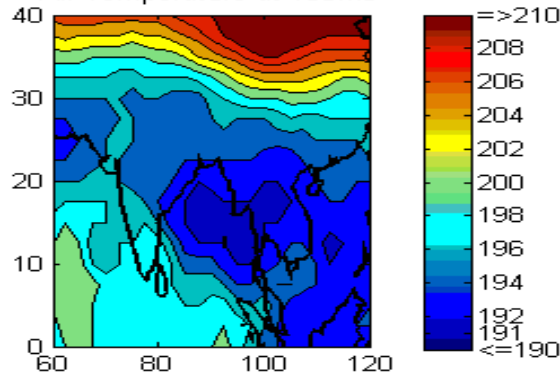

ISCCP.DX.1.MET-5.1999.08.24.1800

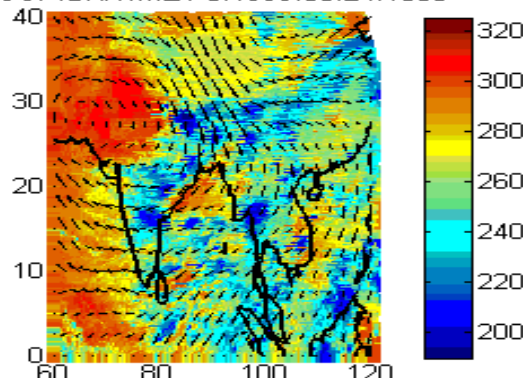

Air Temperature at 100mb

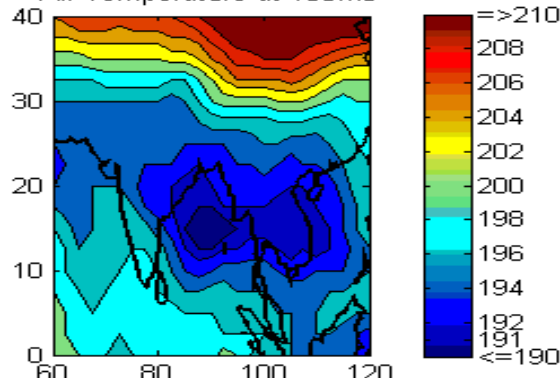

ISCCP.DX.1.MET-5.1999.08.25.0000

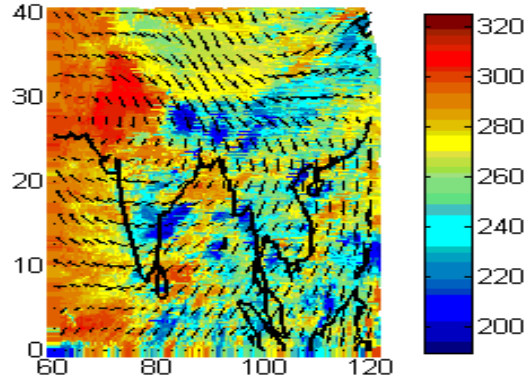

Air Temperature at 100mb

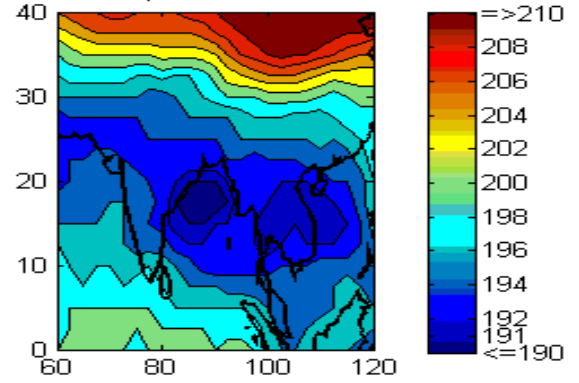

ISCCP.DX.1.MET-5.1999.08.25.0600

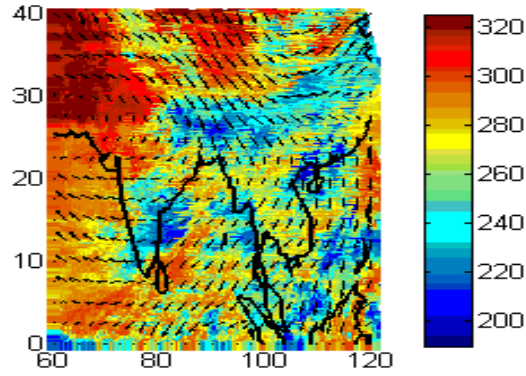

Air Temperature at 100mb

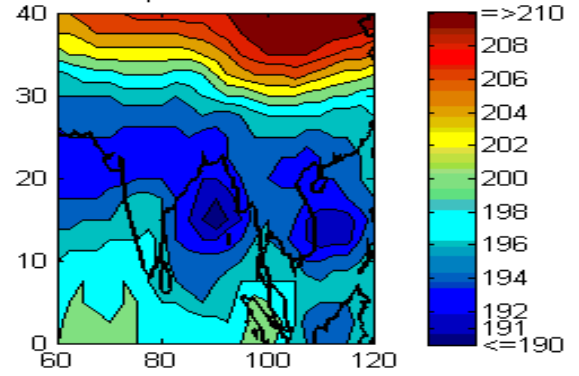

ISCCP.DX.1.MET-5.1999.08.25.1200

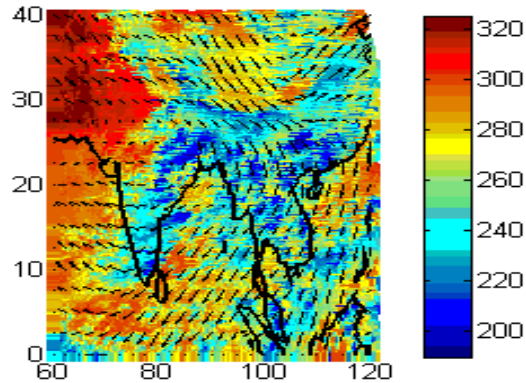

Air Temperature at 100mb

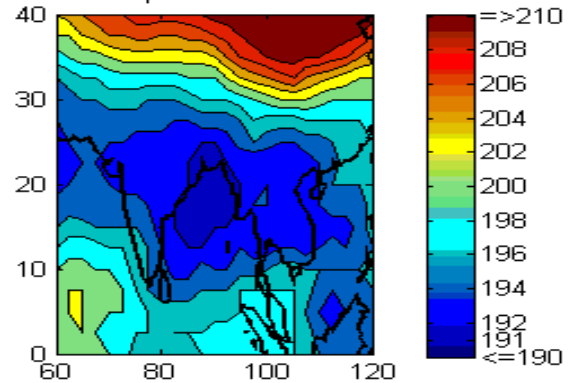

ISCCP.DX.1.MET-5.1999.08.25.1800

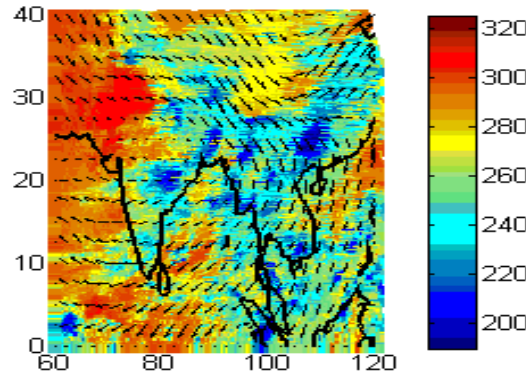

Air Temperature at 100mb

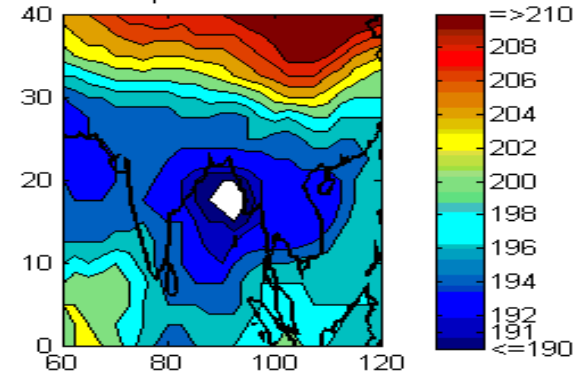

ISCCP.DX.1.MET-5.1999.08.26.0000

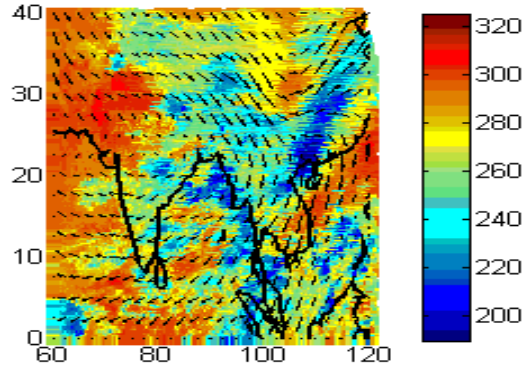

Air Temperature at 100mb

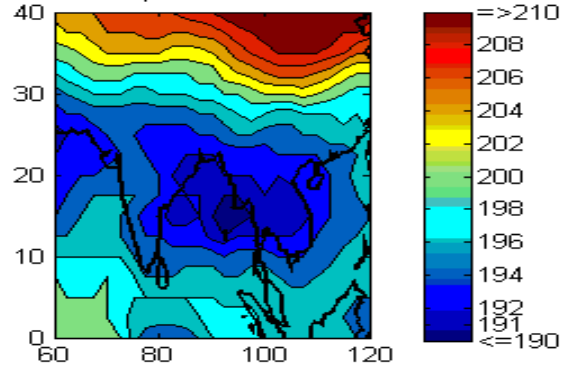

ISCCP.DX.1.MET-5.1999.08.26.0600

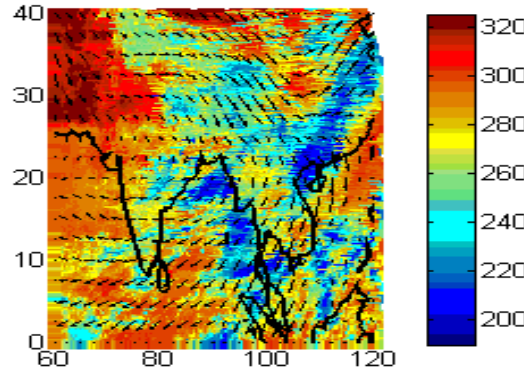

Air Temperature at 100mb

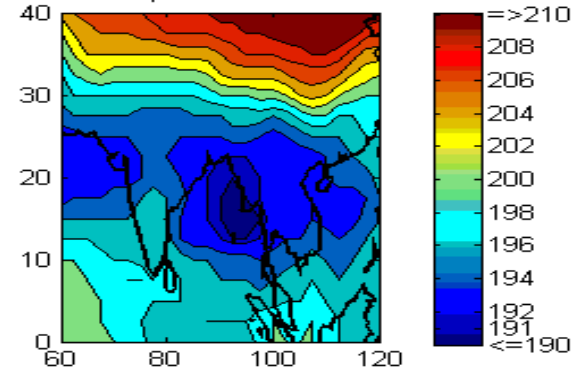

ISCCP.DX.1.MET-5.1999.08.26.1200

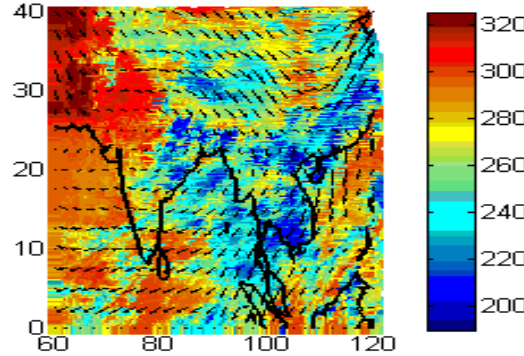

Air Temperature at 100mb

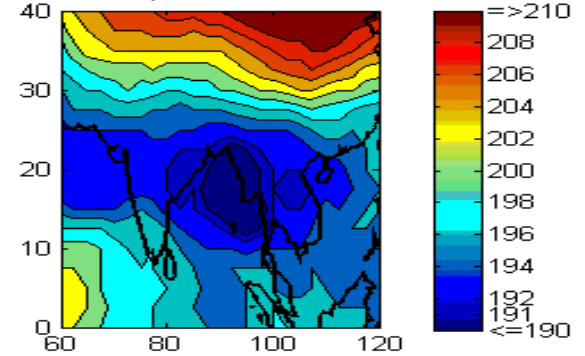

ISCCP.DX.1.MET-5.1999.08.26.1800

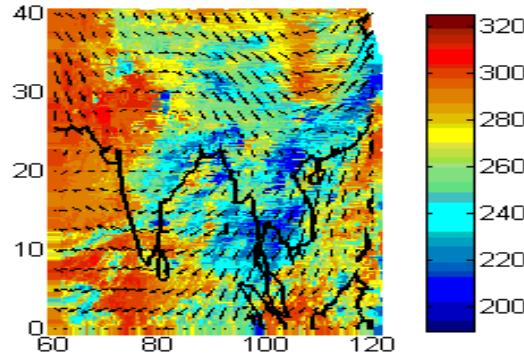

Air Temperature at 100mb

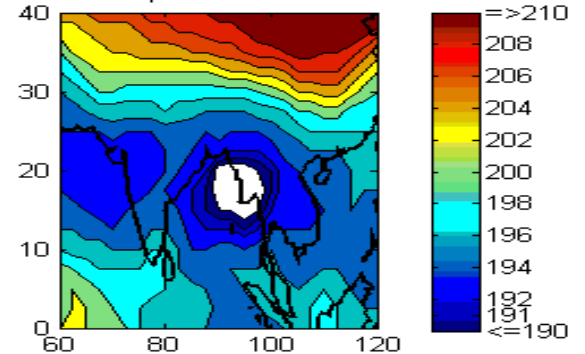

ISCCP.DX.1.MET-5.1999.08.27.0000

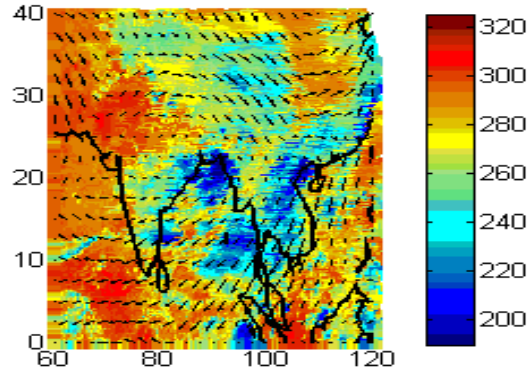

Air Temperature at 100mb

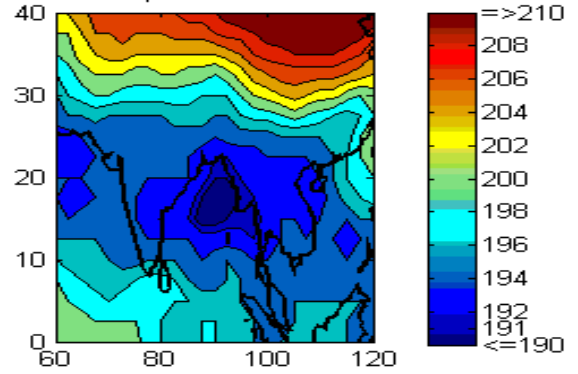

ISCCP.DX.1.MET-5.1999.08.27.0600

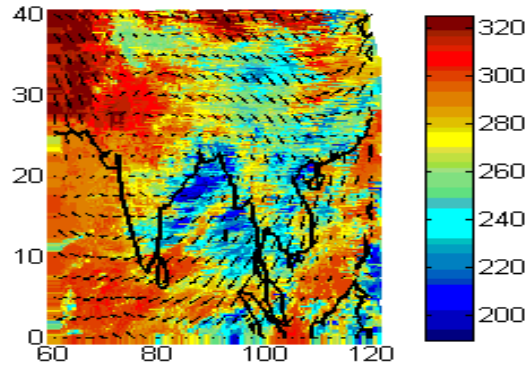

Air Temperature at 100mb

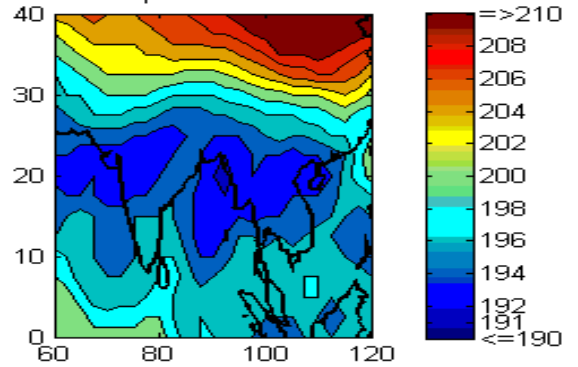

ISCCP.DX.1.MET-5.1999.08.27.1200

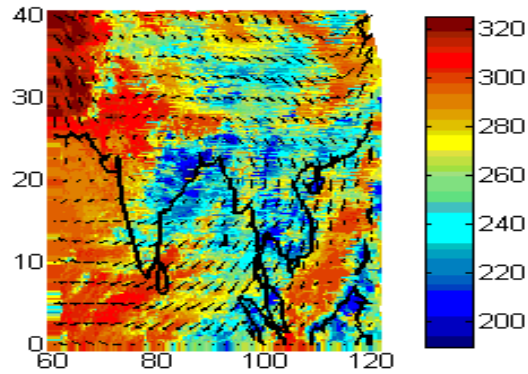

Air Temperature at 100mb

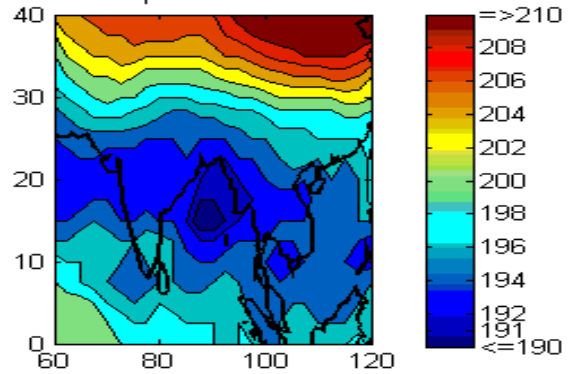

ISCCP.DX.1.MET-5.1999.08.27.1800

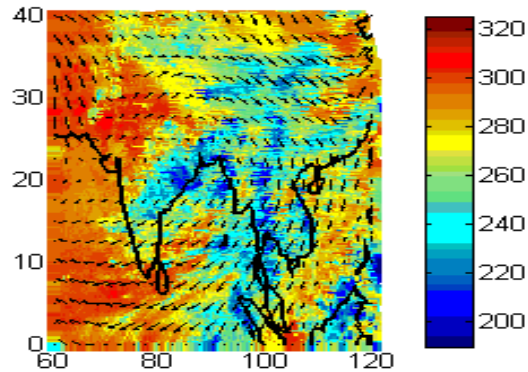

Air Temperature at 100mb

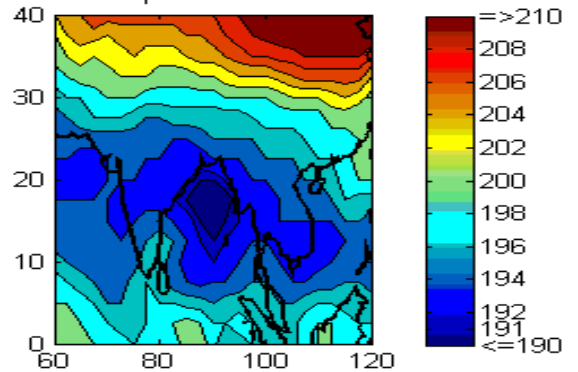

ISCCP.DX.1.MET-5.1999.08.28.0000

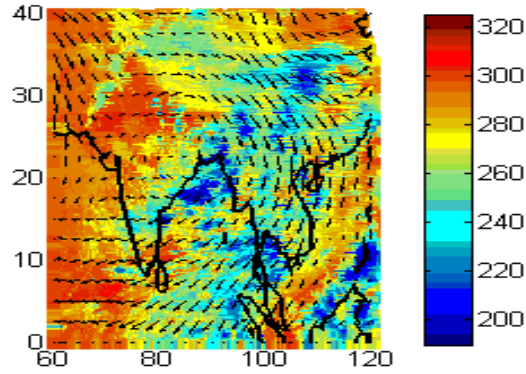

Air Temperature at 100mb

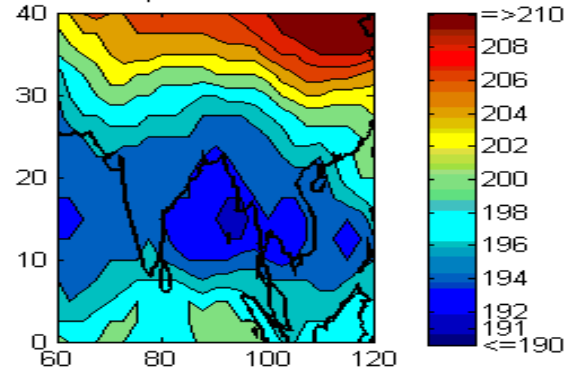

ISCCP.DX.1.MET-5.1999.08.28.0600

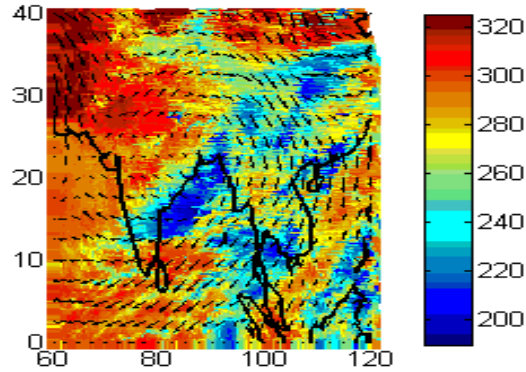

Air Temperature at 100mb

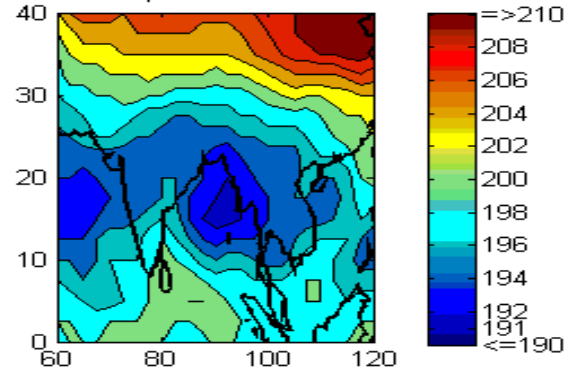

ISCCP.DX.1.MET-5.1999.08.28.1200

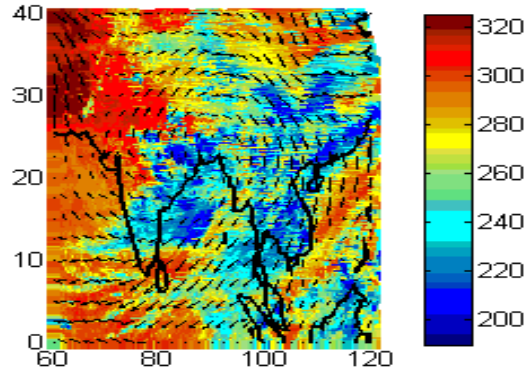

Air Temperature at 100mb

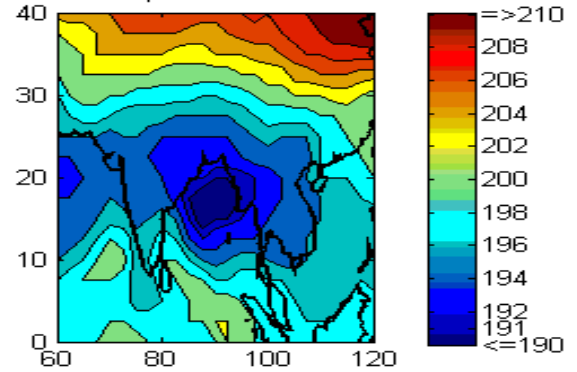

ISCCP.DX.1.MET-5.1999.08.28.1800

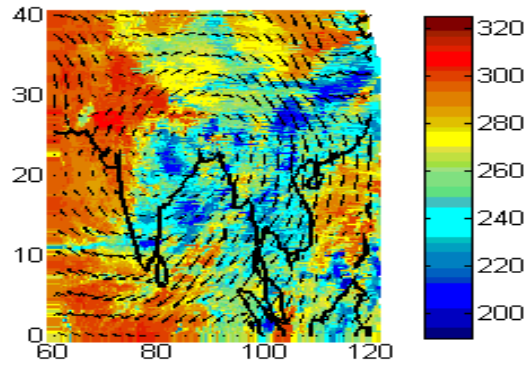

Air Temperature at 100mb

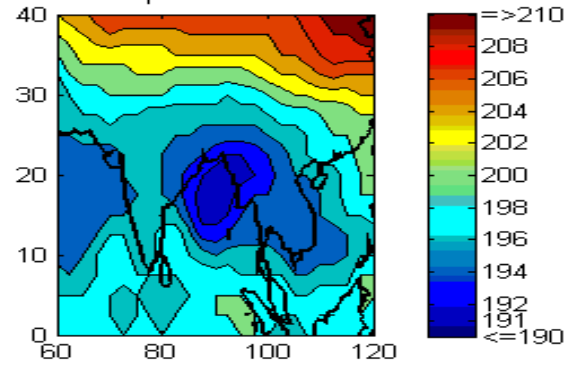

Supplement: Supplementary file 1 [file angeo-28-927-2010-supplement.zip › Supplemantary Material/Auxiliary Material File 2.pdf]
