# Supplementary material for: Mesoscale convection system and occurrence of extreme low tropopause temperatures: observations over Asian summer monsoon region
Source: Copernicus journal article supplement (doi:10.5194/angeo-28-927-2010), 2010-04-12
Supplement: Supplementary file 1 [file angeo-28-927-2010-supplement.zip]

Archive with 2 entries (2 files):
- Supplemantary Material/Auxiliary Material File 1.pdf
- Supplemantary Material/Auxiliary Material File 2.pdf
